# Supplementary material for: Deeply Mining a Universe of Peptides Encoded by Long Noncoding RNAs
Source: PubMed Central journal article supplement — Mol Cell Proteomics. 2021 Jun 12;20:100109. doi: 10.1016/j.mcpro.2021.100109 (PMC8335655; doi:10.1016/j.mcpro.2021.100109), 2021-06-12

# TAAAAAAGTITRPR (NONHSAT126926+unORF+2+peptide1)

FTMS, HCD@27.00, z=+3, Mono m/z=443.25345 Da, MH+=1327.74579 Da, Match Tol.=0.02 Da

Endogenous

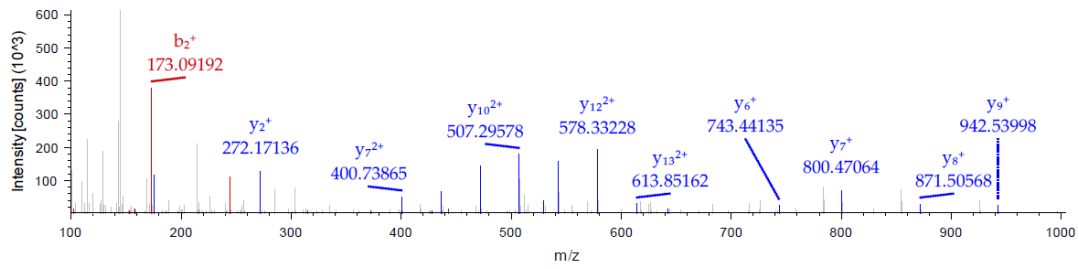

FTMS, HCD@27.00, z=+3, Mono m/z=443.25311 Da, MH+=1327.74479 Da, Match Tol.=0.02 Da

Synthetic

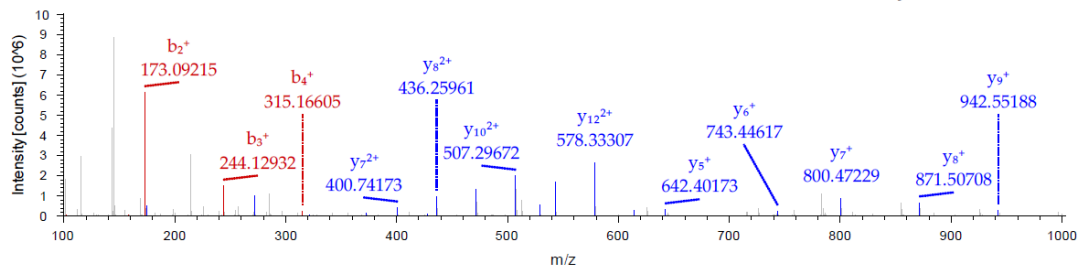

# EALILGSQR (NONHSAT126926+unORF+2+peptide1)

FTMS, HCD@27.00, z=+2, Mono m/z=493.78610 Da, MH+=986.56493 Da, Match Tol.=0.02 Da

Endogenous

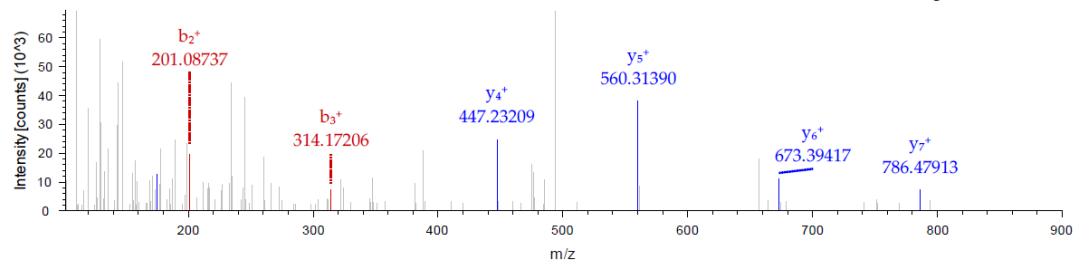

FTMS, HCD@27.00, z=+2, Mono m/z=493.78568 Da, MH+=986.56407 Da, Match Tol.=0.02 Da

Synthetic

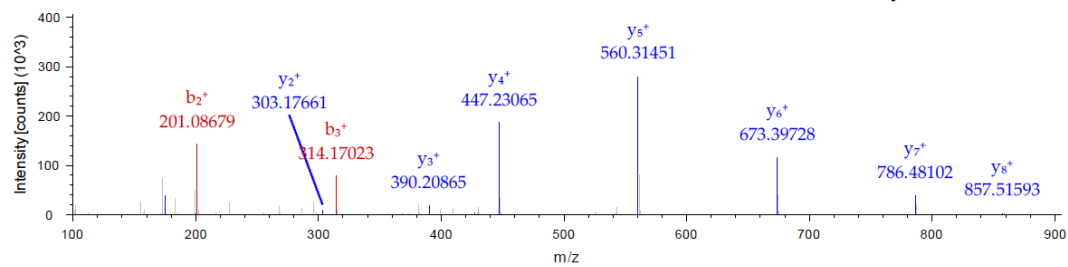

## VHIVTLGEK (NONHSAT029063+unORF+1+peptide1)

FTMS, HCD@27.00, z=+2, Mono m/z=498.29810 Da, MH+=995.58891 Da, Match Tol.=0.02 Da

Endogenous

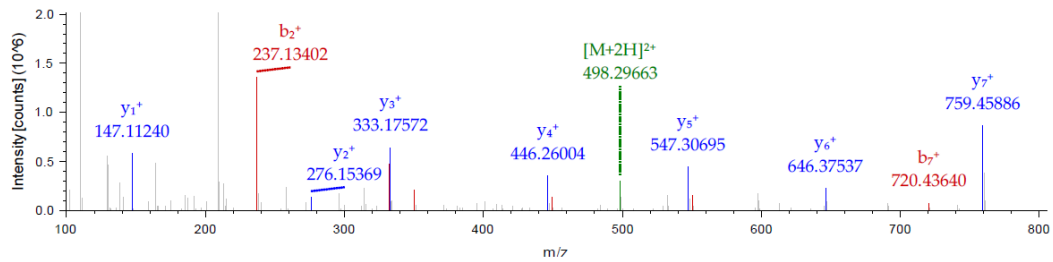

FTMS, HCD@27.00, z=+2, Mono m/z=498.29767 Da, MH+=995.58806 Da, Match Tol.=0.02 Da

Synthetic

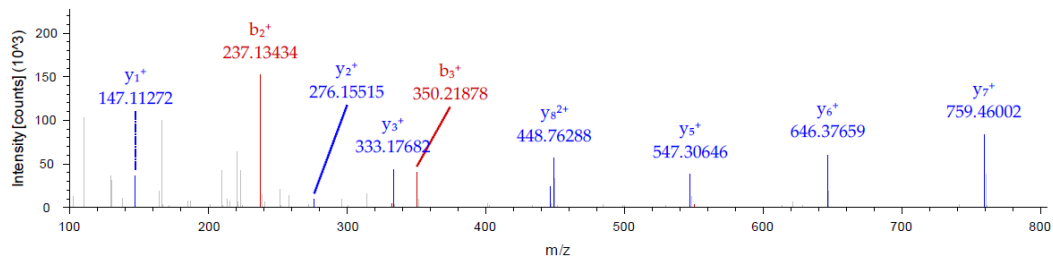

## ILEDFLPSSSR (NONHSAT071961+unORF+2+peptide1)

FTMS, HCD@27.00, z=+2, Mono m/z=680.85602 Da, MH+=1360.70476 Da, Match Tol.=0.02 Da

Endogenous

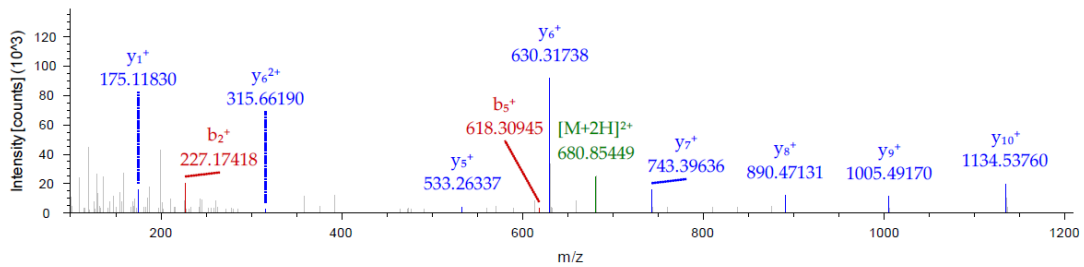

FTMS, HCD@27.00, z=+2, Mono m/z=680.85938 Da, MH+=1360.71147 Da, Match Tol.=0.02 Da

Synthetic

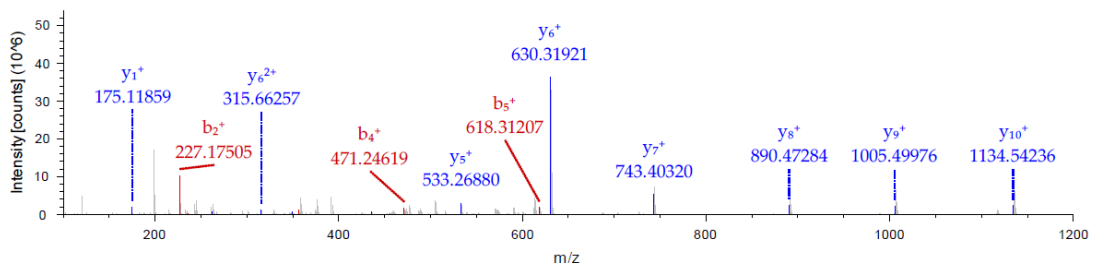

## LFIFYFLNK (NONHSAT089921+unORF+2+peptide3)

FTMS, HCD@27.00, z=+2, Mono m/z=602.83929 Da, MH+=1204.67131 Da, Match Tol.=0.02 Da

Endogenous

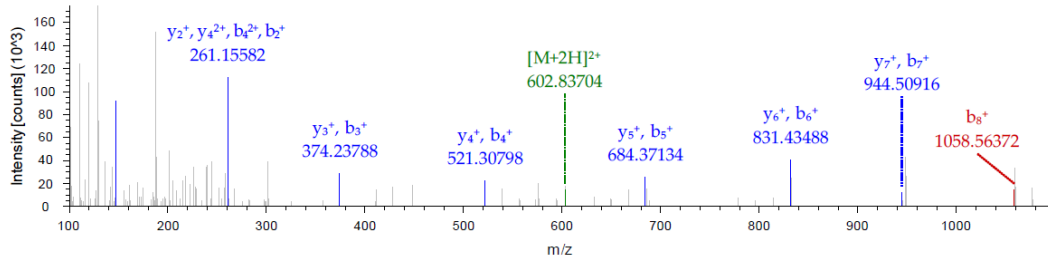

FTMS, HCD@27.00, z=+2, Mono m/z=602.84204 Da, MH+=1204.67681 Da, Match Tol.=0.02 Da

Synthetic

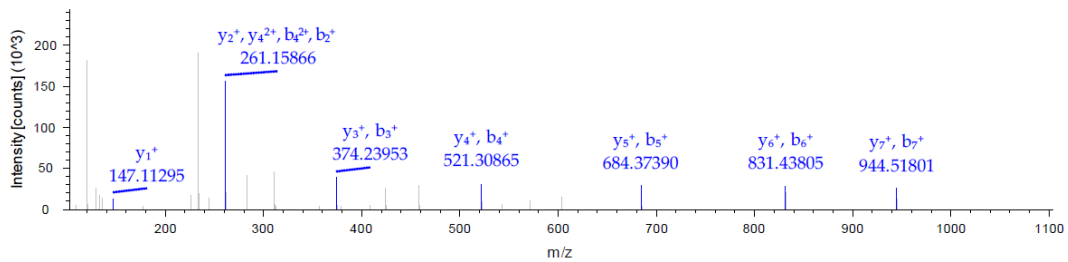

## IDIEFIK (NONHSAT121005+unORF+2+peptide53)

FTMS, HCD@27.00, z=+2, Mono m/z=495.79715 Da, MH+=990.58702 Da, Match Tol.=0.02 Da

Endogenous

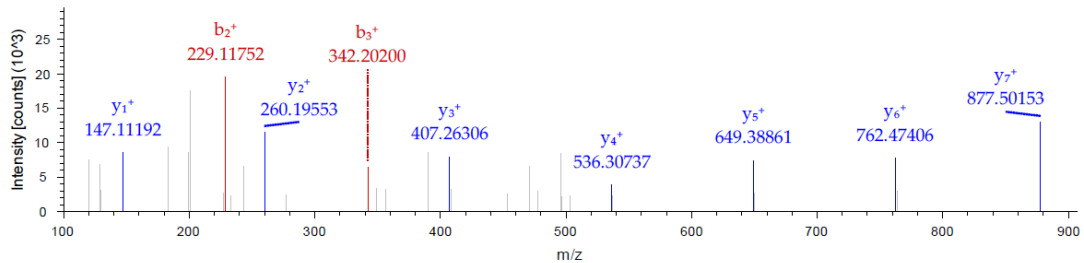

FTMS, HCD@27.00, z=+2, Mono m/z=495.79767 Da, MH+=990.58806 Da, Match Tol.=0.02 Da

Synthetic

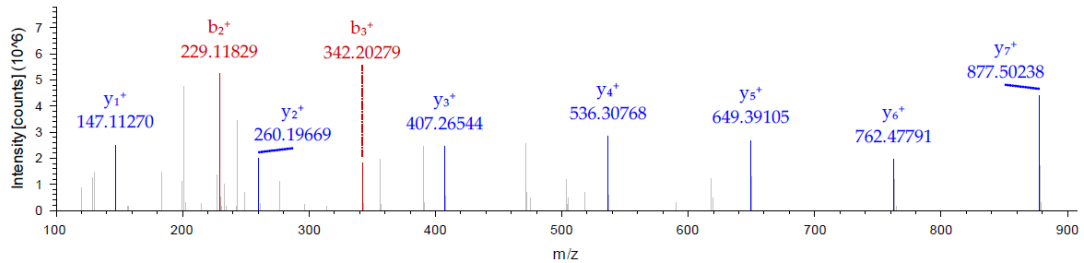

## HASIQMNVEADK (NONHSAT097084+1+orf1)

FTMS, HCD@27.00, z=+2, Mono m/z=721.35974 Da, MH+=1441.71221 Da, Match Tol.=0.02 Da

Endogenous

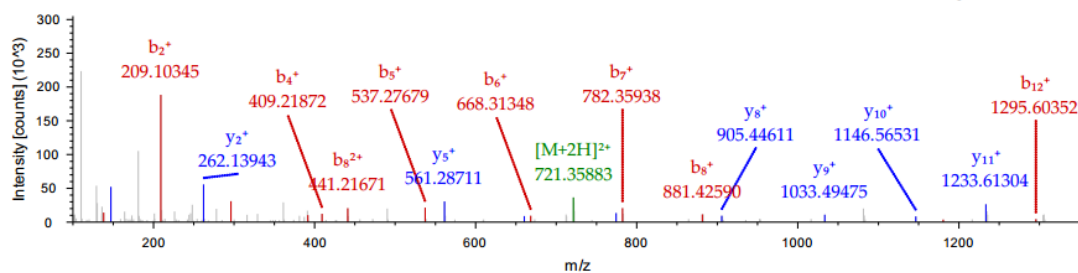

FTMS, HCD@27.00, z=+2, Mono m/z=721.36127 Da, MH+=1441.71526 Da, Match Tol.=0.02 Da

Synthetic

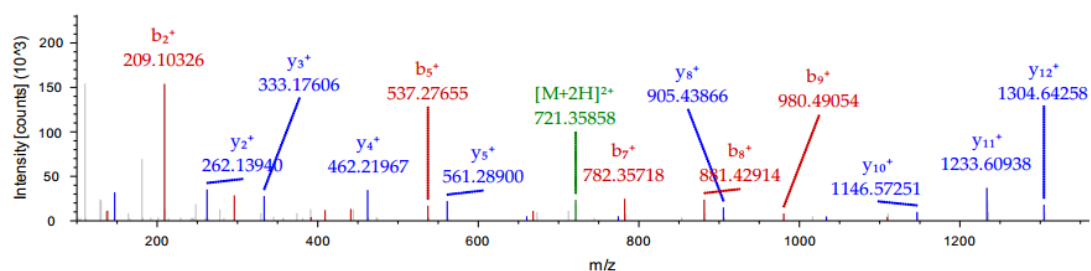

## QTGAVCVHASPR (NONHSAT009961+2+orf1)

FTMS, HCD@27.00, z=+3, Mono m/z=428.21582 Da, MH+=1282.63291 Da, Match Tol.=0.02 Da

Endogenous

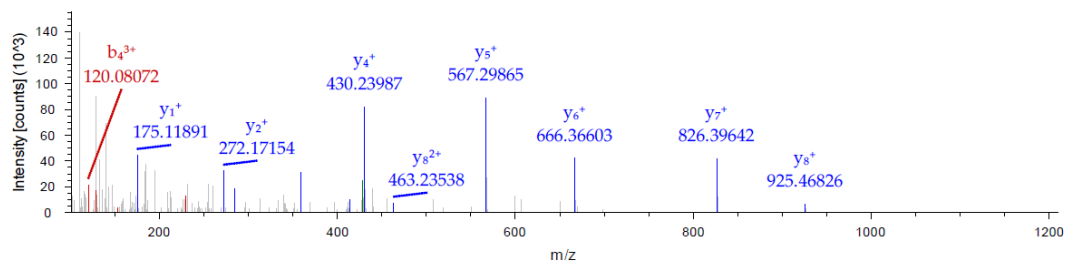

FTMS, HCD@27.00, z=+2, Mono m/z=641.81946 Da, MH+=1282.63164 Da, Match Tol.=0.02 Da

Synthetic

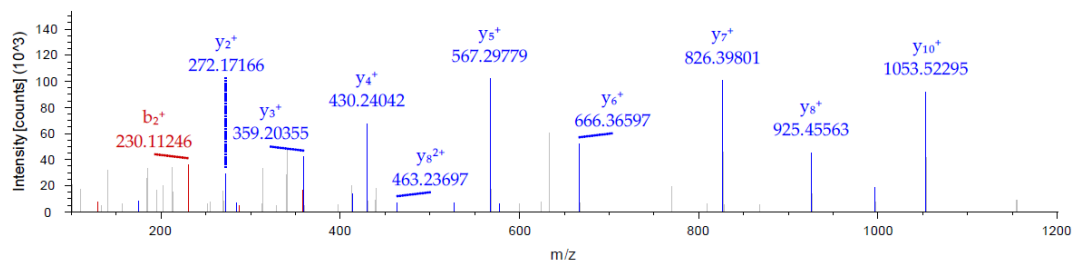

## TCVLLIEAK (NONHSAT011413+unORF+1+peptide4)

FTMS, HCD@27.00, z=+2, Mono m/z=559.80951 Da, MH+=1118.61174 Da, Match Tol.=0.02 Da

Endogenous

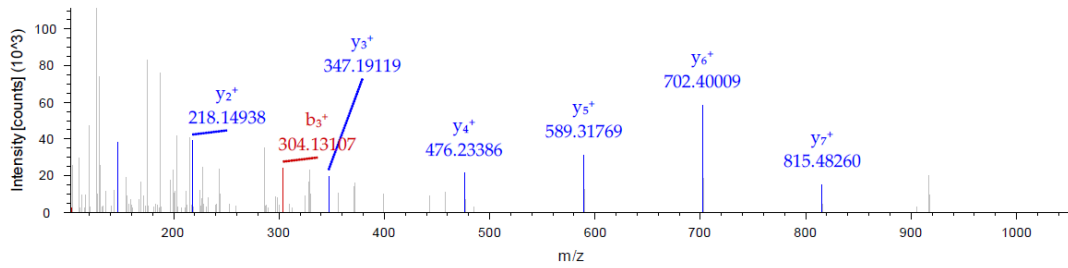

FTMS, HCD@27.00, z=+2, Mono m/z=559.81030 Da, MH+=1118.61333 Da, Match Tol.=0.02 Da

Synthetic

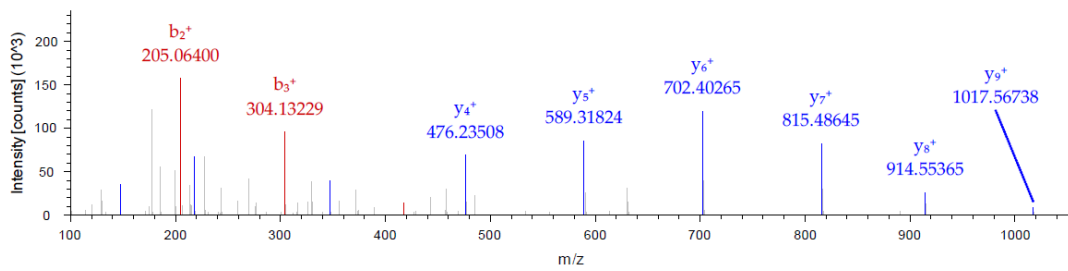

## IEVTEIITDR (NONHSAT034233+3+orf2)

FTMS, HCD@27.00, z=+2, Mono m/z=594.82660 Da, MH+=1188.64592 Da, Match Tol.=0.02 Da

Endogenous

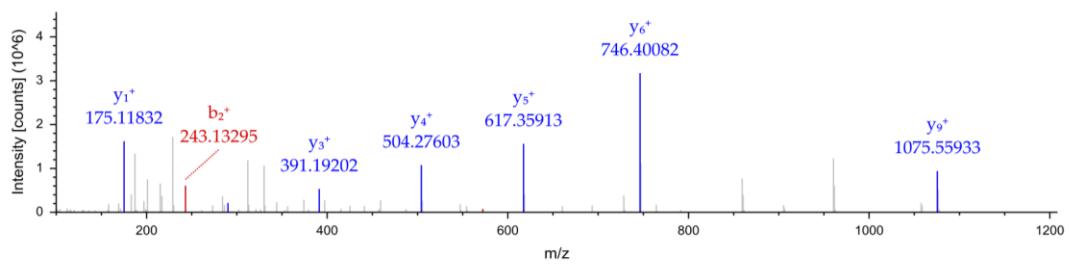

FTMS, HCD@27.00, z=+2, Mono m/z=594.82581 Da, MH+=1188.64433 Da, Match Tol.=0.02 Da

Synthetic

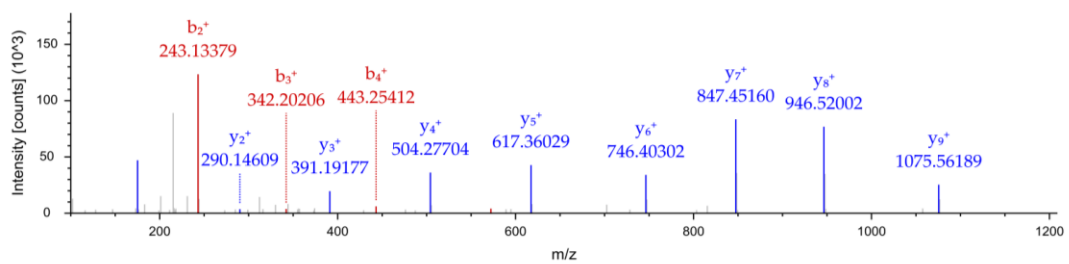

## LLSIEDQLEIR (NONHSAT029960+2+orf8)

FTMS, HCD@27.00, z=+2, Mono m/z=664.87427 Da, MH+=1328.74126 Da, Match Tol.=0.02 Da

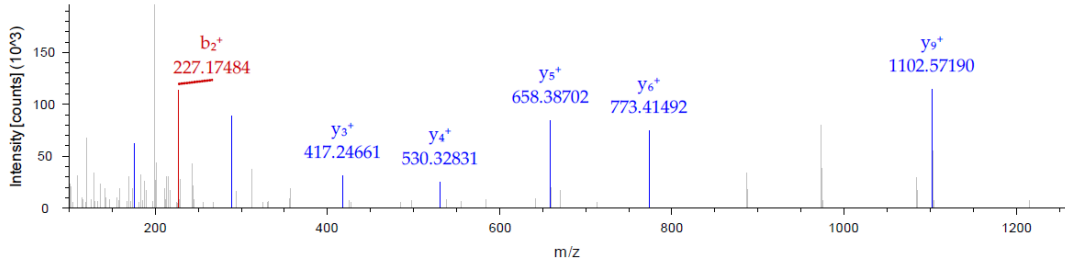

FTMS, HCD@27.00, z=+2, Mono m/z=664.87512 Da, MH+=1328.74297 Da, Match Tol.=0.02 Da

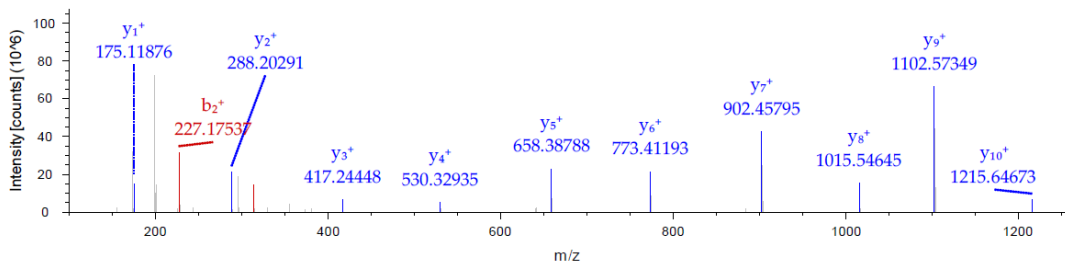

## ANAGPNTDGSQFFICTAK (NONHSAT071306+unORF+1+peptide5)

FTMS, HCD@27.00, z=+2, Mono m/z=949.93878 Da, MH+=1898.87029 Da, Match Tol.=0.02 Da

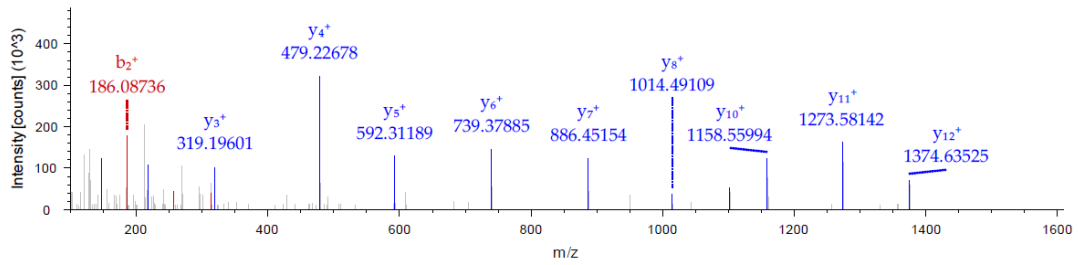

FTMS, HCD@27.00, z=+2, Mono m/z=949.93799 Da, MH+=1898.86870 Da, Match Tol.=0.02 Da

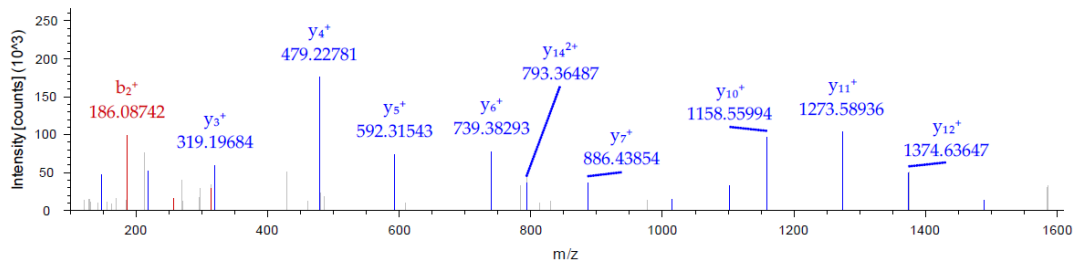

# VGAGAAA VTGR (NONHSAT066795+unORF+2+peptide5)

FTMS, HCD@27.00, z=+2, Mono m/z=500.78033 Da, MH+=1000.55339 Da, Match Tol.=0.02 Da

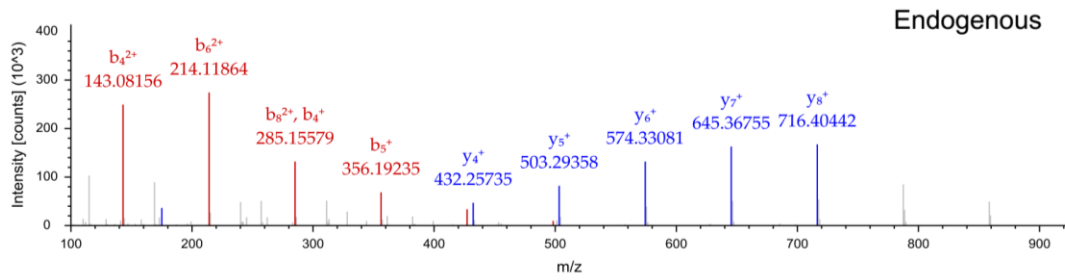

FTMS, HCD@27.00, z=+2, Mono m/z=500.78088 Da, MH+=1000.55449 Da, Match Tol.=0.02 Da

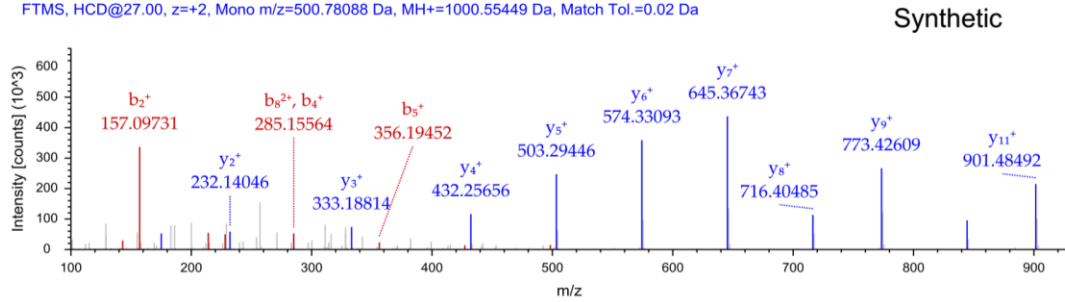

# YLYTLVISEK (NONHSAT090804+unORF+1+peptide2)

FTMS, HCD@27.00, z=+2, Mono m/z=614.84595 Da, MH+=1228.68462 Da, Match Tol.=0.02 Da

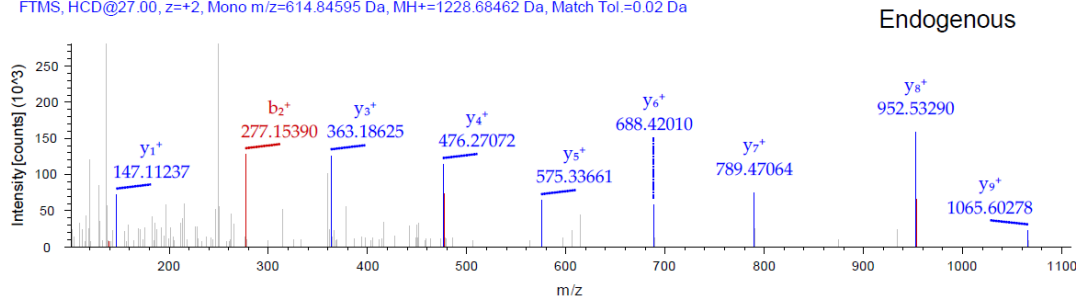

FTMS, HCD@27.00, z=+2, Mono m/z=614.84534 Da, MH+=1228.68340 Da, Match Tol.=0.02 Da

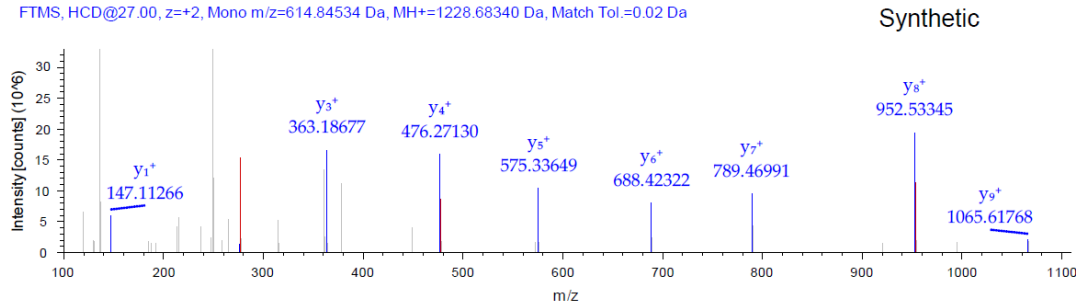

# VIFFYPK (NONHSAT009704+unORF+1+peptide4)

FTMS, HCD@27.00, z=+2, Mono m/z=457.26413 Da, MH+=913.52098 Da, Match Tol.=0.02 Da

Endogenous

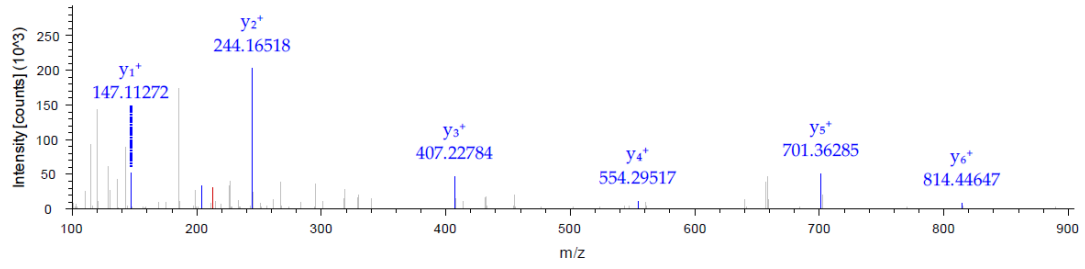

FTMS, HCD@27.00, z=+2, Mono m/z=457.26279 Da, MH+=913.51830 Da, Match Tol.=0.02 Da

Synthetic

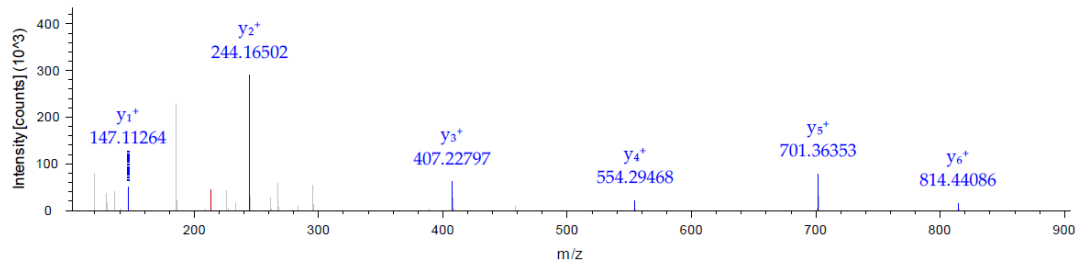

Supplement: mmc2.pdf [file mmc2.pdf]
