# Supplementary material for: Deeply Mining a Universe of Peptides Encoded by Long Noncoding RNAs
Source: PubMed Central journal article supplement — Mol Cell Proteomics. 2021 Jun 12;20:100109. doi: 10.1016/j.mcpro.2021.100109 (PMC8335655; doi:10.1016/j.mcpro.2021.100109), 2021-06-12
Supplement: mmc3.pdf [file mmc3.pdf]

>smproMouse7587016\_QTLGLELLK

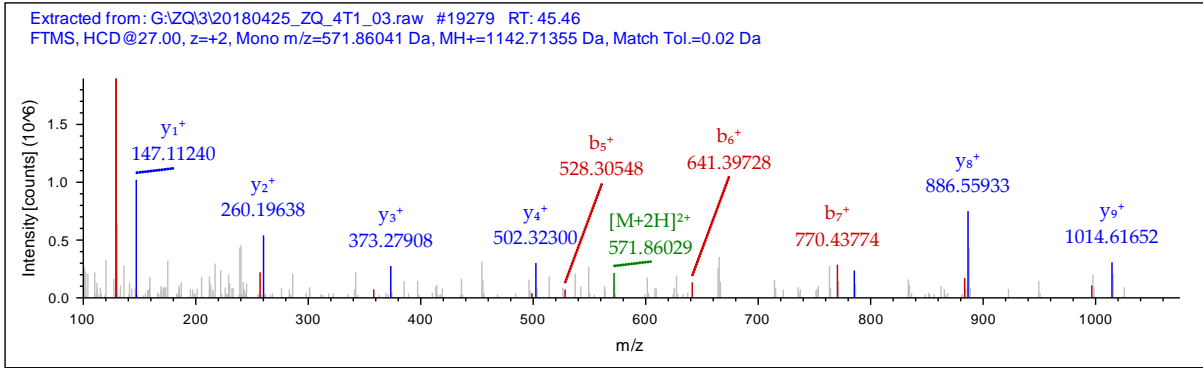

| #1 | b <sup>+</sup> | b <sup>2+</sup> | Seq. | y <sup>+</sup> | y <sup>2+</sup> | #2 |
|----|----------------|-----------------|------|----------------|-----------------|----|
| 1  | 129.10225      | 65.05476        | K    |                |                 | 10 |
| 2  | 257.16083      | 129.08405       | Q    | 1014.61942     | 507.81335       | 9  |
| 3  | 358.20851      | 179.60789       | T    | 886.56084      | 443.78406       | 8  |
| 4  | 471.29258      | 236.14993       | L    | 785.51316      | 393.26022       | 7  |
| 5  | 528.31405      | 264.66066       | G    | 672.42909      | 336.71818       | 6  |
| 6  | 641.39812      | 321.20270       | L    | 615.40762      | 308.20745       | 5  |
| 7  | 770.44072      | 385.72400       | E    | 502.32355      | 251.66541       | 4  |
| 8  | 883.52479      | 442.26603       | L    | 373.28095      | 187.14411       | 3  |
| 9  | 996.60886      | 498.80807       | L    | 260.19688      | 130.60208       | 2  |
| 10 |                |                 | K    | 147.11281      | 74.06004        | 1  |

>smproMouse7587016\_QTLGLELLK

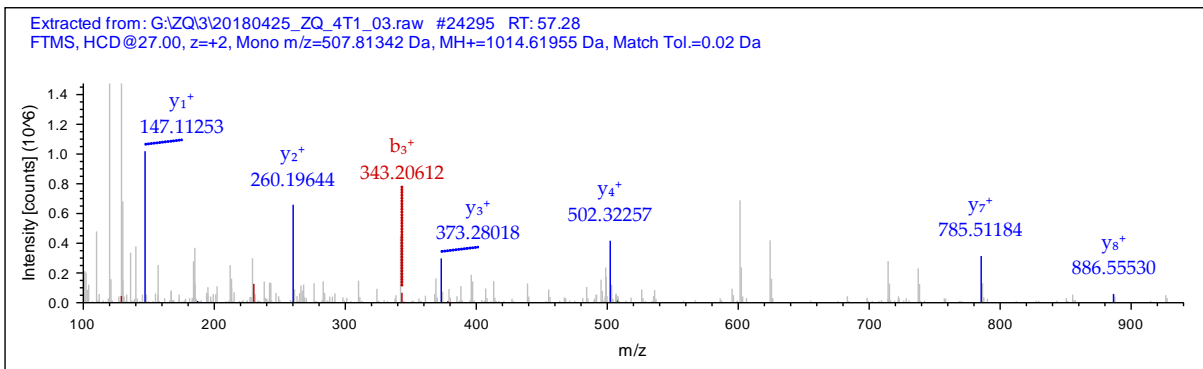

| #1 | b <sup>+</sup> | b <sup>2+</sup> | Seq. | y <sup>+</sup> | y <sup>2+</sup> | #2 |
|----|----------------|-----------------|------|----------------|-----------------|----|
| 1  | 129.06586      | 65.03657        | Q    |                |                 | 9  |
| 2  | 230.11354      | 115.56041       | T    | 886.56084      | 443.78406       | 8  |
| 3  | 343.19761      | 172.10244       | L    | 785.51316      | 393.26022       | 7  |
| 4  | 400.21908      | 200.61318       | G    | 672.42909      | 336.71818       | 6  |
| 5  | 513.30315      | 257.15521       | L    | 615.40762      | 308.20745       | 5  |
| 6  | 642.34575      | 321.67651       | E    | 502.32355      | 251.66541       | 4  |
| 7  | 755.42982      | 378.21855       | L    | 373.28095      | 187.14411       | 3  |
| 8  | 868.51389      | 434.76058       | L    | 260.19688      | 130.60208       | 2  |
| 9  |                |                 | K    | 147.11281      | 74.06004        | 1  |

>smproMouse2604921\_DKGVLSQPSPHQHAPLQSGGR

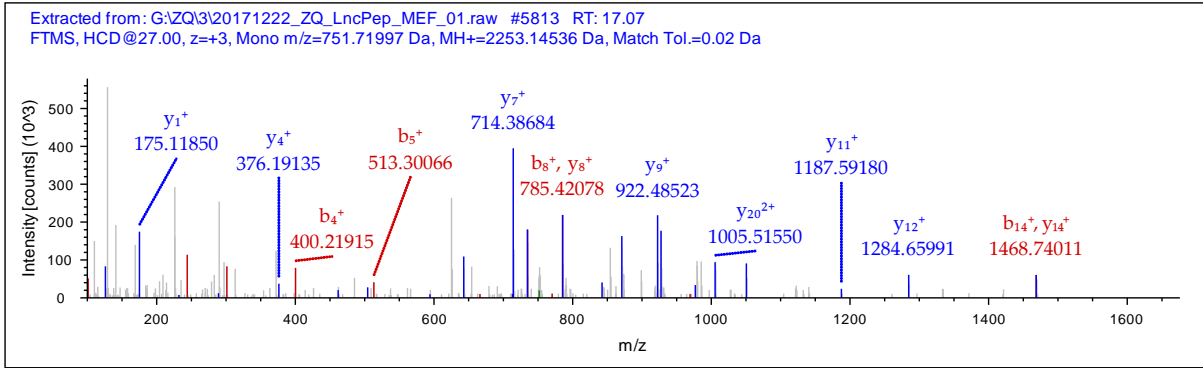

| #1 | b <sup>+</sup> | b <sup>2+</sup> | b <sup>3+</sup> | Seq. | y <sup>+</sup> | y <sup>2+</sup> | y <sup>3+</sup> | #2 |
|----|----------------|-----------------|-----------------|------|----------------|-----------------|-----------------|----|
| 1  | 116.03423      | 58.52075        | 39.34959        | D    |                |                 |                 | 22 |
| 2  | 244.12920      | 122.56824       | 82.04792        | K    | 2138.12145     | 1069.56436      | 713.37867       | 21 |
| 3  | 301.15067      | 151.07897       | 101.05507       | G    | 2010.02648     | 1005.51688      | 670.68034       | 20 |
| 4  | 400.21909      | 200.61318       | 134.07788       | V    | 1953.00501     | 977.00614       | 651.67319       | 19 |
| 5  | 513.30316      | 257.15522       | 171.77257       | L    | 1853.93659     | 927.47193       | 618.65038       | 18 |
| 6  | 570.32463      | 285.66595       | 190.77973       | G    | 1740.85252     | 870.92990       | 580.95569       | 17 |
| 7  | 657.35666      | 329.18197       | 219.79040       | S    | 1683.83105     | 842.41916       | 561.94853       | 16 |
| 8  | 785.41524      | 393.21126       | 262.47660       | Q    | 1596.79902     | 798.90315       | 532.93786       | 15 |
| 9  | 882.46801      | 441.73764       | 294.82752       | P    | 1468.74044     | 734.87386       | 490.25166       | 14 |
| 10 | 969.50004      | 485.25366       | 323.83820       | S    | 1371.68767     | 686.34747       | 457.90074       | 13 |
| 11 | 1066.55281     | 533.78004       | 356.18912       | P    | 1284.65564     | 642.83146       | 428.89006       | 12 |
| 12 | 1203.61172     | 602.30950       | 401.87542       | H    | 1187.60287     | 594.30507       | 396.53914       | 11 |
| 13 | 1331.67030     | 666.33879       | 444.56162       | Q    | 1050.54396     | 525.77562       | 350.85284       | 10 |
| 14 | 1468.72921     | 734.86824       | 490.24792       | H    | 922.48538      | 461.74633       | 308.16664       | 9  |
| 15 | 1539.76633     | 770.38680       | 513.92696       | A    | 785.42647      | 393.21687       | 262.48034       | 8  |
| 16 | 1636.81910     | 818.91319       | 546.27788       | P    | 714.38935      | 357.69831       | 238.80130       | 7  |
| 17 | 1749.90317     | 875.45522       | 583.97257       | L    | 617.33658      | 309.17193       | 206.45038       | 6  |
| 18 | 1877.96175     | 939.48451       | 626.65877       | Q    | 504.25251      | 252.62989       | 168.75669       | 5  |
| 19 | 1964.99378     | 983.00053       | 655.66944       | S    | 376.19393      | 188.60060       | 126.06949       | 4  |
| 20 | 2022.01525     | 1011.51126      | 674.67660       | G    | 289.16190      | 145.08459       | 97.05882        | 3  |
| 21 | 2079.03672     | 1040.02200      | 693.68376       | G    | 232.14043      | 116.57385       | 78.05166        | 2  |
| 22 |                |                 |                 | R    | 175.11896      | 88.06312        | 59.04450        | 1  |

>smproMouse2604921\_HATGTESRPAALAFHVPDWPQVSR

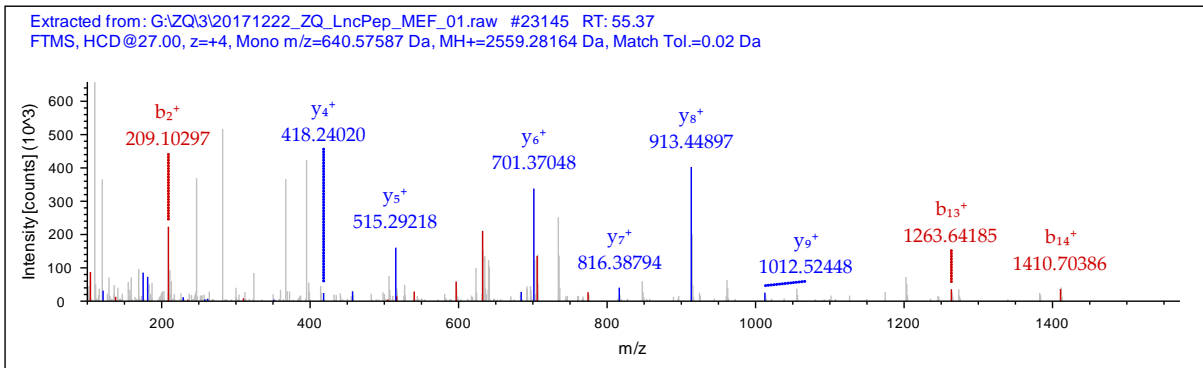

| #1 | b <sup>+</sup> | b <sup>2+</sup> | b <sup>3+</sup> | b <sup>4+</sup> | Seq. | y <sup>+</sup> | y <sup>2+</sup> | y <sup>3+</sup> | y <sup>4+</sup> | #2 |
|----|----------------|-----------------|-----------------|-----------------|------|----------------|-----------------|-----------------|-----------------|----|
| 1  | 138.06619      | 69.53673        | 46.69358        | 35.27200        | H    |                |                 |                 |                 | 24 |
| 2  | 209.10331      | 105.05529       | 70.37262        | 53.03128        | A    | 2422.22634     | 1211.61681      | 808.08030       | 606.31204       | 23 |
| 3  | 310.15099      | 155.57913       | 104.05518       | 78.29320        | T    | 235.118922     | 1176.09825      | 784.40126       | 588.55276       | 22 |
| 4  | 367.17246      | 184.08987       | 123.06234       | 92.54857        | G    | 2250.14154     | 1125.57441      | 750.71870       | 563.29084       | 21 |
| 5  | 468.22014      | 234.61371       | 156.74490       | 117.81049       | T    | 2193.12007     | 1097.06367      | 731.71154       | 549.03548       | 20 |
| 6  | 597.26274      | 299.13501       | 199.75910       | 150.07114       | E    | 2092.07239     | 1046.53983      | 698.02898       | 523.77356       | 19 |
| 7  | 684.29477      | 342.65102       | 228.76977       | 171.82915       | S    | 1963.02979     | 982.01853       | 655.01478       | 491.51291       | 18 |
| 8  | 840.39589      | 420.70158       | 280.80348       | 210.85443       | R    | 1875.99776     | 938.50252       | 626.00410       | 469.75490       | 17 |
| 9  | 937.44866      | 469.22797       | 313.15440       | 235.11762       | P    | 1719.89664     | 860.45196       | 573.97040       | 430.72962       | 16 |
| 10 | 1008.48578     | 504.74653       | 336.83344       | 252.87690       | A    | 1622.84387     | 811.92557       | 541.61947       | 406.46643       | 15 |
| 11 | 1079.52290     | 540.26509       | 360.51248       | 270.63618       | A    | 1551.80675     | 776.40701       | 517.94043       | 388.70715       | 14 |
| 12 | 1192.60697     | 596.80712       | 398.20717       | 298.90720       | L    | 1480.76963     | 740.88845       | 494.26139       | 370.94787       | 13 |
| 13 | 1263.64409     | 632.32568       | 421.88621       | 316.66648       | A    | 1367.68556     | 684.34642       | 456.56670       | 342.67685       | 12 |
| 14 | 1410.71251     | 705.85989       | 470.90902       | 353.43358       | F    | 1296.64844     | 648.82786       | 432.88766       | 324.91757       | 11 |
| 15 | 1547.77142     | 774.38935       | 516.59532       | 387.69831       | H    | 1149.58002     | 575.29365       | 383.86486       | 288.15046       | 10 |
| 16 | 1646.83984     | 823.92356       | 549.61813       | 412.46542       | V    | 1012.52111     | 506.76419       | 338.17855       | 253.88574       | 9  |
| 17 | 1743.89261     | 872.44994       | 581.96905       | 436.72861       | P    | 913.45269      | 457.22998       | 305.15575       | 229.11863       | 8  |
| 18 | 1858.91956     | 929.96342       | 620.31137       | 465.48535       | D    | 816.39992      | 408.70360       | 272.80482       | 204.85544       | 7  |
| 19 | 2044.99888     | 1023.00308      | 682.33781       | 512.00518       | W    | 701.37297      | 351.19012       | 234.46251       | 176.09870       | 6  |
| 20 | 2142.05165     | 1071.52946      | 714.68873       | 536.26837       | P    | 515.29365      | 258.15046       | 172.43607       | 129.57887       | 5  |
| 21 | 2199.07312     | 1100.04020      | 733.69589       | 550.52374       | G    | 418.24088      | 209.62408       | 140.08514       | 105.31568       | 4  |
| 22 | 2298.14154     | 1149.57441      | 766.71870       | 575.29084       | V    | 361.21941      | 181.11334       | 121.07799       | 91.06031        | 3  |
| 23 | 2385.17357     | 1193.09042      | 795.72937       | 597.04885       | S    | 262.15099      | 131.57913       | 88.05518        | 66.29321        | 2  |
| 24 |                |                 |                 |                 | R    | 175.11896      | 88.06312        | 59.04450        | 44.53520        | 1  |

>smproMouse2604921\_PAALAFHVPDWPVGVS

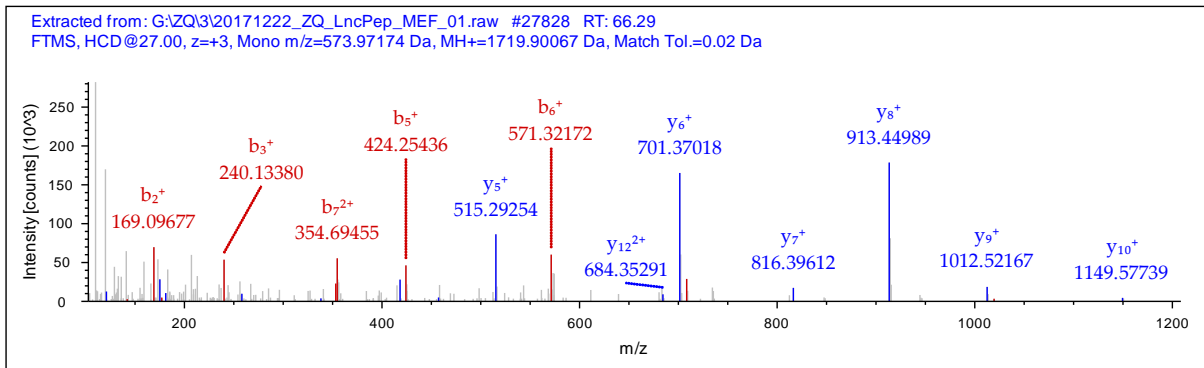

| #1 | b <sup>+</sup> | b <sup>2+</sup> | b <sup>3+</sup> | Seq. | y <sup>+</sup> | y <sup>2+</sup> | y <sup>3+</sup> | #2 |
|----|----------------|-----------------|-----------------|------|----------------|-----------------|-----------------|----|
| 1  | 98.06005       | 49.53366        | 33.35820        | P    |                |                 |                 | 16 |
| 2  | 169.09717      | 85.05222        | 57.03724        | A    | 1622.84387     | 811.92557       | 541.61947       | 15 |
| 3  | 240.13429      | 120.57078       | 80.71628        | A    | 1551.80675     | 776.40701       | 517.94043       | 14 |
| 4  | 353.21836      | 177.11282       | 118.41097       | L    | 1480.76963     | 740.88845       | 494.26139       | 13 |
| 5  | 424.25548      | 212.63138       | 142.09001       | A    | 1367.68556     | 684.34642       | 456.56670       | 12 |
| 6  | 571.32390      | 286.16559       | 191.11282       | F    | 1296.64844     | 648.82786       | 432.88766       | 11 |
| 7  | 708.38281      | 354.69504       | 236.79912       | H    | 1149.58002     | 575.29365       | 383.86486       | 10 |
| 8  | 807.45123      | 404.22925       | 269.82193       | V    | 1012.52111     | 506.76419       | 338.17855       | 9  |
| 9  | 904.50400      | 452.75564       | 302.17285       | P    | 913.45269      | 457.22998       | 305.15575       | 8  |
| 10 | 1019.53095     | 510.26911       | 340.51517       | D    | 816.39992      | 408.70360       | 272.80482       | 7  |
| 11 | 1205.61027     | 603.30877       | 402.54161       | W    | 701.37297      | 351.19012       | 234.46251       | 6  |
| 12 | 1302.66304     | 651.83516       | 434.89253       | P    | 515.29365      | 258.15046       | 172.43607       | 5  |
| 13 | 1359.68451     | 680.34589       | 453.89969       | G    | 418.24088      | 209.62408       | 140.08514       | 4  |
| 14 | 1458.75293     | 729.88010       | 486.92249       | V    | 361.21941      | 181.11334       | 121.07799       | 3  |
| 15 | 1545.78496     | 773.39612       | 515.93317       | S    | 262.15099      | 131.57913       | 88.05518        | 2  |
| 16 |                |                 |                 | R    | 175.11896      | 88.06312        | 59.04450        | 1  |

>smproMouse3643811\_GESGQWSPR

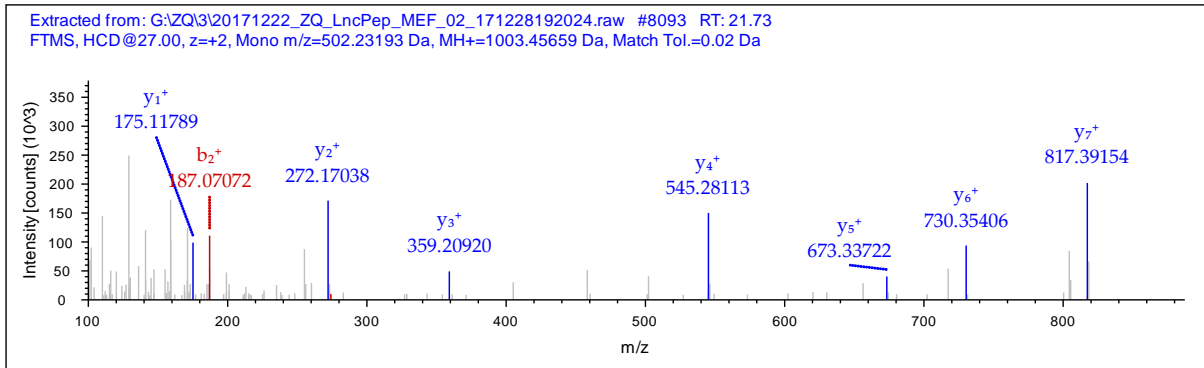

| #1 | b <sup>+</sup> | b <sup>2+</sup> | Seq. | y <sup>+</sup> | y <sup>2+</sup> | #2 |
|----|----------------|-----------------|------|----------------|-----------------|----|
| 1  | 58.02875       | 29.51801        | G    |                |                 | 9  |
| 2  | 187.07135      | 94.03931        | E    | 946.43776      | 473.72252       | 8  |
| 3  | 274.10338      | 137.55533       | S    | 817.39516      | 409.20122       | 7  |
| 4  | 331.12485      | 166.06606       | G    | 730.36313      | 365.68520       | 6  |
| 5  | 459.18343      | 230.09535       | Q    | 673.34166      | 337.17447       | 5  |
| 6  | 645.26275      | 323.13501       | W    | 545.28308      | 273.14518       | 4  |
| 7  | 732.29478      | 366.65103       | S    | 359.20376      | 180.10552       | 3  |
| 8  | 829.34755      | 415.17741       | P    | 272.17173      | 136.58950       | 2  |
| 9  |                |                 | R    | 175.11896      | 88.06312        | 1  |

>smproMouse3643811\_KGESGQWSPR

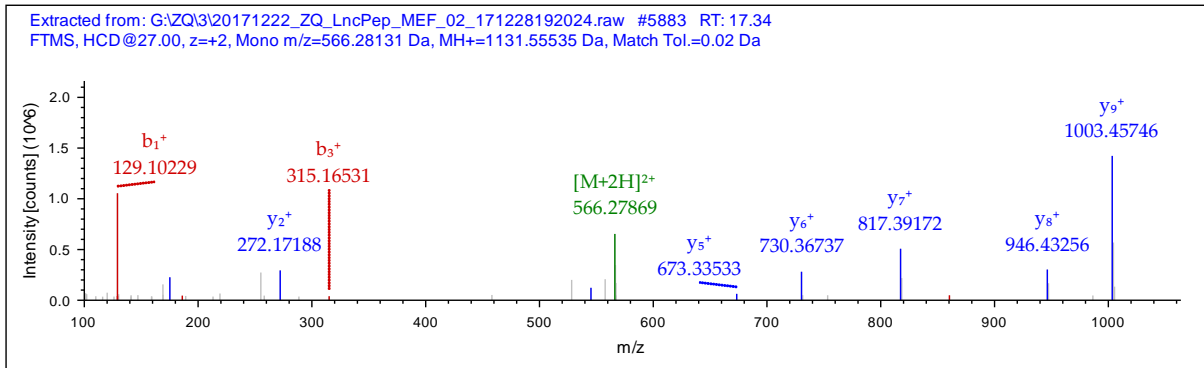

| #1 | b <sup>+</sup> | b <sup>2+</sup> | Seq. | y <sup>+</sup> | y <sup>2+</sup> | #2 |
|----|----------------|-----------------|------|----------------|-----------------|----|
| 1  | 129.10225      | 65.05476        | K    |                |                 | 10 |
| 2  | 186.12372      | 93.56550        | G    | 1003.45923     | 502.23325       | 9  |
| 3  | 315.16632      | 158.08680       | E    | 946.43776      | 473.72252       | 8  |
| 4  | 402.19835      | 201.60281       | S    | 817.39516      | 409.20122       | 7  |
| 5  | 459.21982      | 230.11355       | G    | 730.36313      | 365.68520       | 6  |
| 6  | 587.27840      | 294.14284       | Q    | 673.34166      | 337.17447       | 5  |
| 7  | 773.35772      | 387.18250       | W    | 545.28308      | 273.14518       | 4  |
| 8  | 860.38975      | 430.69851       | S    | 359.20376      | 180.10552       | 3  |
| 9  | 957.44252      | 479.22490       | P    | 272.17173      | 136.58950       | 2  |
| 10 |                |                 | R    | 175.11896      | 88.06312        | 1  |

>smproMouse2669262\_VVEDKDYFLFR

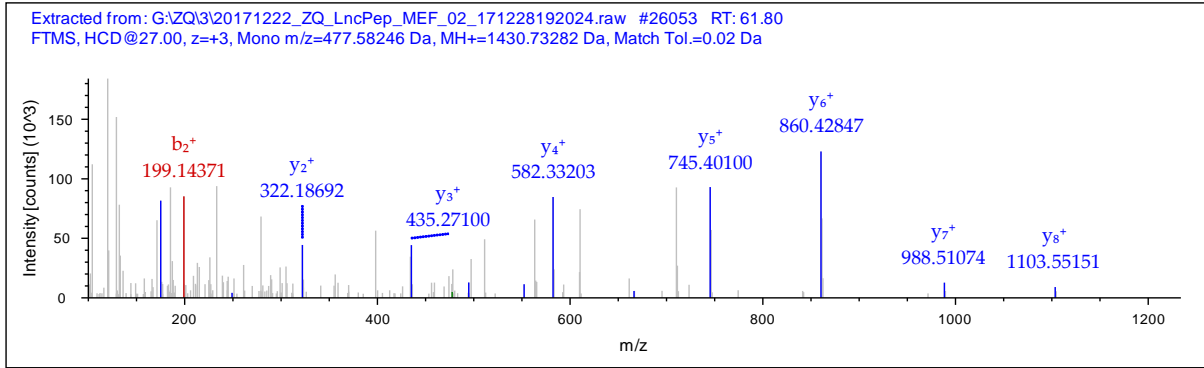

| #1 | b <sup>+</sup> | b <sup>2+</sup> | b <sup>3+</sup> | Seq. | y <sup>+</sup> | y <sup>2+</sup> | y <sup>3+</sup> | #2 |
|----|----------------|-----------------|-----------------|------|----------------|-----------------|-----------------|----|
| 1  | 100.07570      | 50.54149        | 34.03008        | V    |                |                 |                 | 11 |
| 2  | 199.14412      | 100.07570       | 67.05289        | V    | 1331.66308     | 666.33518       | 444.55921       | 10 |
| 3  | 328.18672      | 164.59700       | 110.06709       | E    | 1232.59466     | 616.80097       | 411.53640       | 9  |
| 4  | 443.21367      | 222.11047       | 148.40941       | D    | 1103.55206     | 552.27967       | 368.52220       | 8  |
| 5  | 571.30864      | 286.15796       | 191.10773       | K    | 988.52511      | 494.76619       | 330.17989       | 7  |
| 6  | 686.33559      | 343.67143       | 229.45005       | D    | 860.43014      | 430.71871       | 287.48156       | 6  |
| 7  | 849.39891      | 425.20309       | 283.80449       | Y    | 745.40319      | 373.20523       | 249.13925       | 5  |
| 8  | 996.46733      | 498.73730       | 332.82729       | F    | 582.33987      | 291.67357       | 194.78481       | 4  |
| 9  | 1109.55140     | 555.27934       | 370.52198       | L    | 435.27145      | 218.13936       | 145.76200       | 3  |
| 10 | 1256.61982     | 628.81355       | 419.54479       | F    | 322.18738      | 161.59733       | 108.06731       | 2  |
| 11 |                |                 |                 | R    | 175.11896      | 88.06312        | 59.04450        | 1  |

>smproMouse8230924\_NKTGAAPIDVVR

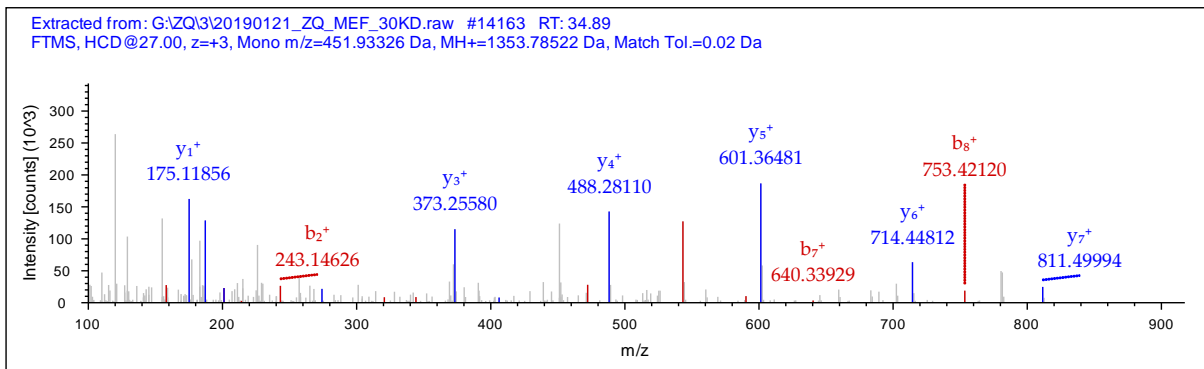

| #1 | b <sup>+</sup> | b <sup>2+</sup> | b <sup>3+</sup> | Seq. | y <sup>+</sup> | y <sup>2+</sup> | y <sup>3+</sup> | #2 |
|----|----------------|-----------------|-----------------|------|----------------|-----------------|-----------------|----|
| 1  | 115.05021      | 58.02874        | 39.02159        | N    |                |                 |                 | 13 |
| 2  | 243.14518      | 122.07623       | 81.71991        | K    | 1239.74202     | 620.37465       | 413.91886       | 12 |
| 3  | 344.19286      | 172.60007       | 115.40247       | T    | 1111.64705     | 556.32716       | 371.22053       | 11 |
| 4  | 401.21433      | 201.11080       | 134.40963       | G    | 1010.59937     | 505.80332       | 337.53797       | 10 |
| 5  | 472.25145      | 236.62936       | 158.08867       | A    | 953.57790      | 477.29259       | 318.53082       | 9  |
| 6  | 543.28857      | 272.14792       | 181.76771       | A    | 882.54078      | 441.77403       | 294.85178       | 8  |
| 7  | 640.34134      | 320.67431       | 214.11863       | P    | 811.50366      | 406.25547       | 271.17274       | 7  |
| 8  | 753.42541      | 377.21634       | 251.81332       | I    | 714.45089      | 357.72908       | 238.82181       | 6  |
| 9  | 866.50948      | 433.75838       | 289.50801       | I    | 601.36682      | 301.18705       | 201.12712       | 5  |
| 10 | 981.53643      | 491.27185       | 327.85033       | D    | 488.28275      | 244.64501       | 163.43243       | 4  |
| 11 | 1080.60485     | 540.80606       | 360.87313       | V    | 373.25580      | 187.13154       | 125.09012       | 3  |
| 12 | 1179.67327     | 590.34027       | 393.89594       | V    | 274.18738      | 137.59733       | 92.06731        | 2  |
| 13 |                |                 |                 | R    | 175.11896      | 88.06312        | 59.04450        | 1  |

>smproMouse8230924\_TGAAPIDVVR

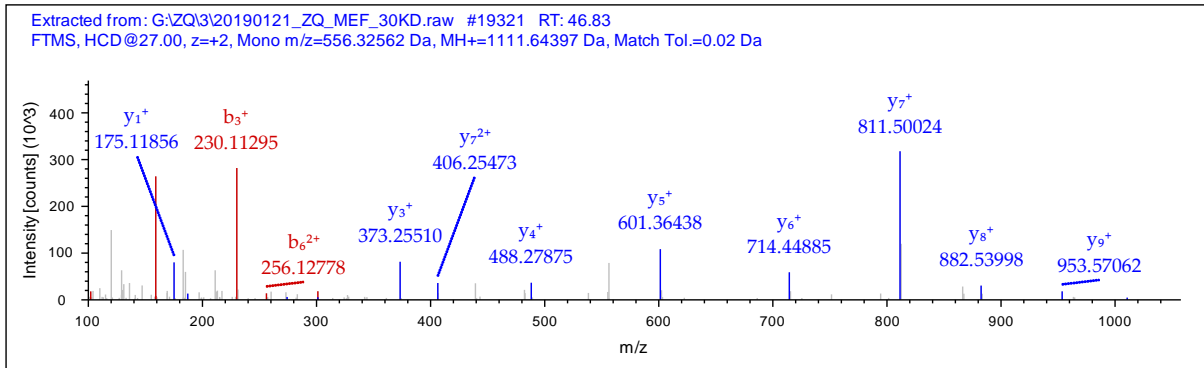

| #1 | b <sup>+</sup> | b <sup>2+</sup> | Seq. | y <sup>+</sup> | y <sup>2+</sup> | #2 |
|----|----------------|-----------------|------|----------------|-----------------|----|
| 1  | 102.05496      | 51.53112        | T    |                |                 | 11 |
| 2  | 159.07643      | 80.04185        | G    | 1010.59937     | 505.80332       | 10 |
| 3  | 230.11355      | 115.56041       | A    | 953.57790      | 477.29259       | 9  |
| 4  | 301.15067      | 151.07897       | A    | 882.54078      | 441.77403       | 8  |
| 5  | 398.20344      | 199.60536       | P    | 811.50366      | 406.25547       | 7  |
| 6  | 511.28751      | 256.14739       | I    | 714.45089      | 357.72908       | 6  |
| 7  | 624.37158      | 312.68943       | I    | 601.36682      | 301.18705       | 5  |
| 8  | 739.39853      | 370.20290       | D    | 488.28275      | 244.64501       | 4  |
| 9  | 838.46695      | 419.73711       | V    | 373.25580      | 187.13154       | 3  |
| 10 | 937.53537      | 469.27132       | V    | 274.18738      | 137.59733       | 2  |
| 11 |                |                 | R    | 175.11896      | 88.06312        | 1  |

>smproMouse81871\_AEAVENPTSDQPTR

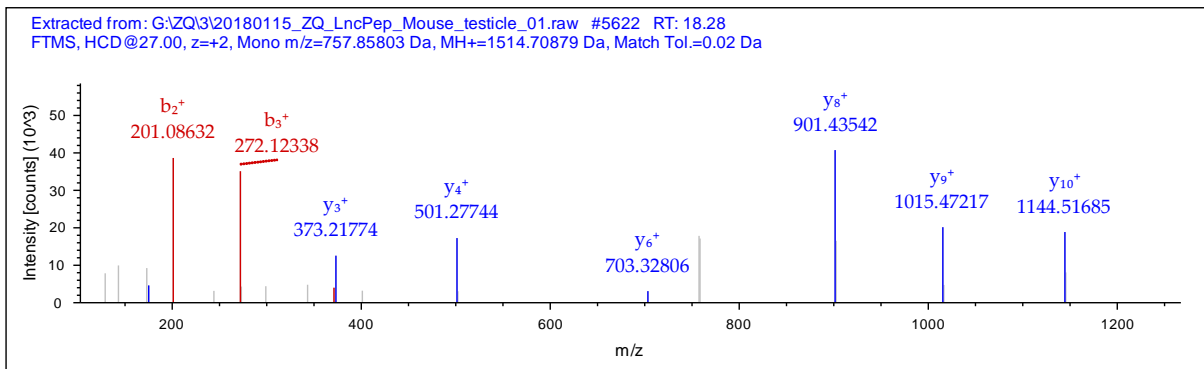

| #1 | b <sup>+</sup> | b <sup>2+</sup> | Seq. | y <sup>+</sup> | y <sup>2+</sup> | #2 |
|----|----------------|-----------------|------|----------------|-----------------|----|
| 1  | 72.04440       | 36.52584        | A    |                |                 | 14 |
| 2  | 201.08700      | 101.04714       | E    | 1443.67109     | 722.33918       | 13 |
| 3  | 272.12412      | 136.56570       | A    | 1314.62849     | 657.81788       | 12 |
| 4  | 371.19254      | 186.09991       | V    | 1243.59137     | 622.29932       | 11 |
| 5  | 500.23514      | 250.62121       | E    | 1144.52295     | 572.76511       | 10 |
| 6  | 614.27807      | 307.64267       | N    | 1015.48035     | 508.24381       | 9  |
| 7  | 711.33084      | 356.16906       | P    | 901.43742      | 451.22235       | 8  |
| 8  | 812.37852      | 406.69290       | T    | 804.38465      | 402.69596       | 7  |
| 9  | 899.41055      | 450.20891       | S    | 703.33697      | 352.17212       | 6  |
| 10 | 1014.43750     | 507.72239       | D    | 616.30494      | 308.65611       | 5  |
| 11 | 1142.49608     | 571.75168       | Q    | 501.27799      | 251.14263       | 4  |
| 12 | 1239.54885     | 620.27806       | P    | 373.21941      | 187.11334       | 3  |
| 13 | 1340.59653     | 670.80190       | T    | 276.16664      | 138.58696       | 2  |
| 14 |                |                 | R    | 175.11896      | 88.06312        | 1  |

>smproMouse81871\_EVKPVSGPNLK

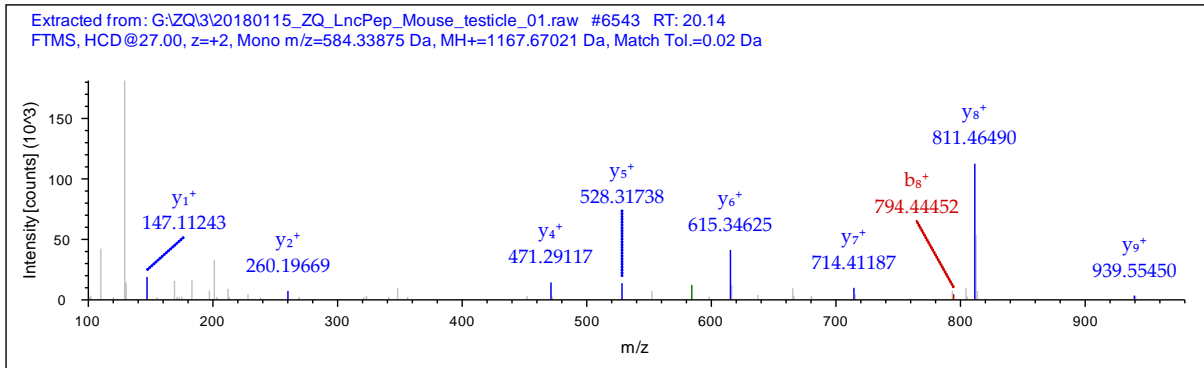

| #1 | b <sup>+</sup> | b <sup>2+</sup> | Seq. | y <sup>+</sup> | y <sup>2+</sup> | #2 |
|----|----------------|-----------------|------|----------------|-----------------|----|
| 1  | 130.04988      | 65.52858        | E    |                |                 | 11 |
| 2  | 229.11830      | 115.06279       | V    | 1038.63066     | 519.81897       | 10 |
| 3  | 357.21327      | 179.11027       | K    | 939.56224      | 470.28476       | 9  |
| 4  | 454.26604      | 227.63666       | P    | 811.46727      | 406.23727       | 8  |
| 5  | 553.33446      | 277.17087       | V    | 714.41450      | 357.71089       | 7  |
| 6  | 640.36649      | 320.68688       | S    | 615.34608      | 308.17668       | 6  |
| 7  | 697.38796      | 349.19762       | G    | 528.31405      | 264.66066       | 5  |
| 8  | 794.44073      | 397.72400       | P    | 471.29258      | 236.14993       | 4  |
| 9  | 908.48366      | 454.74547       | N    | 374.23981      | 187.62354       | 3  |
| 10 | 1021.56773     | 511.28750       | L    | 260.19688      | 130.60208       | 2  |
| 11 |                |                 | K    | 147.11281      | 74.06004        | 1  |

>smproMouse81871\_EVKPVSGPNLKGEEPLMASK

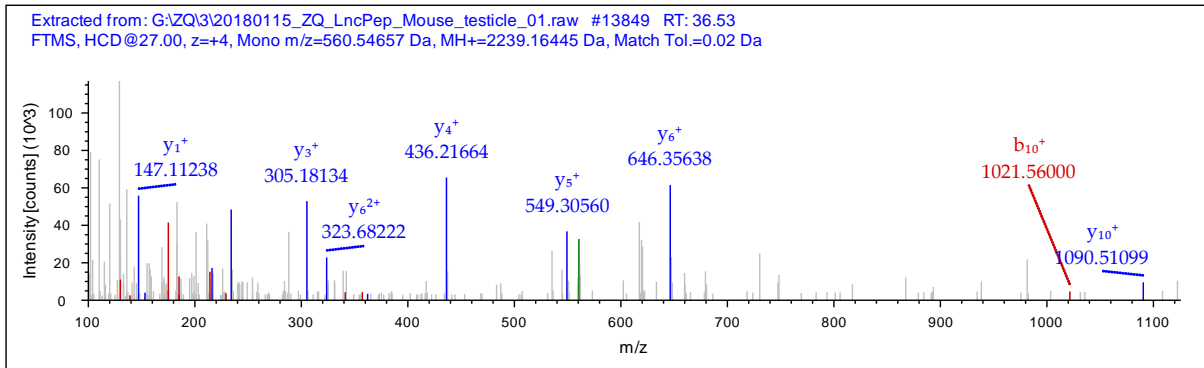

| #1 | b <sup>+</sup> | b <sup>2+</sup> | b <sup>3+</sup> | b <sup>4+</sup> | Seq. | y <sup>+</sup> | y <sup>2+</sup> | y <sup>3+</sup> | y <sup>4+</sup> | #2 |
|----|----------------|-----------------|-----------------|-----------------|------|----------------|-----------------|-----------------|-----------------|----|
| 1  | 130.04988      | 65.52858        | 44.02148        | 33.26793        | E    |                |                 |                 |                 | 21 |
| 2  | 229.11830      | 115.06279       | 77.04428        | 58.03503        | V    | 2110.12139     | 1055.56433      | 704.04531       | 528.28581       | 20 |
| 3  | 357.21327      | 179.11027       | 119.74261       | 90.05877        | K    | 2011.05297     | 1006.03012      | 671.02251       | 503.51870       | 19 |
| 4  | 454.26604      | 227.63666       | 152.09353       | 114.32197       | P    | 1882.95800     | 941.98264       | 628.32418       | 471.49496       | 18 |
| 5  | 553.33446      | 277.17087       | 185.11634       | 139.08907       | V    | 1785.90523     | 893.45625       | 595.97326       | 447.23177       | 17 |
| 6  | 640.36649      | 320.68688       | 214.12701       | 160.84708       | S    | 1686.83681     | 843.92204       | 562.95045       | 422.46466       | 16 |
| 7  | 697.38796      | 349.19762       | 233.13417       | 175.10245       | G    | 1599.80478     | 800.40603       | 533.93978       | 400.70665       | 15 |
| 8  | 794.44073      | 397.72400       | 265.48509       | 199.36564       | P    | 1542.78331     | 771.89529       | 514.93262       | 386.45129       | 14 |
| 9  | 908.48366      | 454.74547       | 303.49940       | 227.87637       | N    | 1445.73054     | 723.36891       | 482.58170       | 362.18809       | 13 |
| 10 | 1021.56773     | 511.28750       | 341.19409       | 256.14739       | L    | 1331.68761     | 666.34744       | 444.56739       | 333.67736       | 12 |
| 11 | 1149.66270     | 575.33499       | 383.89242       | 288.17113       | K    | 1218.60354     | 609.80541       | 406.87270       | 305.40634       | 11 |
| 12 | 1206.68417     | 603.84572       | 402.89957       | 302.42650       | G    | 1090.50857     | 545.75792       | 364.17437       | 273.38260       | 10 |
| 13 | 1335.72677     | 668.36702       | 445.91377       | 334.68715       | E    | 1033.48710     | 517.24719       | 345.16722       | 259.12723       | 9  |
| 14 | 1464.76937     | 732.88832       | 488.92797       | 366.94780       | E    | 904.44450      | 452.72589       | 302.15302       | 226.86658       | 8  |
| 15 | 1593.81197     | 797.40962       | 531.94217       | 399.20845       | E    | 775.40190      | 388.20459       | 259.13882       | 194.60593       | 7  |
| 16 | 1690.86474     | 845.93601       | 564.29310       | 423.47164       | P    | 646.35930      | 323.68329       | 216.12462       | 162.34528       | 6  |
| 17 | 1803.94881     | 902.47804       | 601.98779       | 451.74266       | L    | 549.30653      | 275.15690       | 183.77369       | 138.08209       | 5  |
| 18 | 1934.98931     | 967.99829       | 645.66795       | 484.50278       | M    | 436.22246      | 218.61487       | 146.07900       | 109.81107       | 4  |
| 19 | 2006.02643     | 1003.51685      | 669.34699       | 502.26206       | A    | 305.18196      | 153.09462       | 102.39884       | 77.05095        | 3  |
| 20 | 2093.05846     | 1047.03287      | 698.35767       | 524.02007       | S    | 234.14484      | 117.57606       | 78.71980        | 59.29167        | 2  |
| 21 |                |                 |                 |                 | K    | 147.11281      | 74.06004        | 49.70912        | 37.53366        | 1  |

>NONHSAT090804+unORF+1+peptide2\_LYTLVISEK

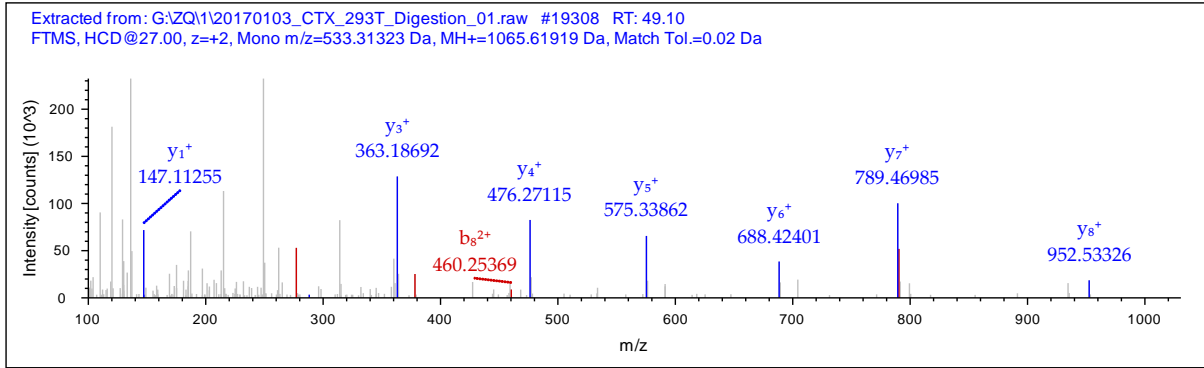

| #1 | b <sup>+</sup> | b <sup>2+</sup> | Seq. | y <sup>+</sup> | y <sup>2+</sup> | #2 |
|----|----------------|-----------------|------|----------------|-----------------|----|
| 1  | 114.09135      | 57.54931        | L    |                |                 | 9  |
| 2  | 277.15467      | 139.08097       | Y    | 952.53500      | 476.77114       | 8  |
| 3  | 378.20235      | 189.60481       | T    | 789.47168      | 395.23948       | 7  |
| 4  | 491.28642      | 246.14685       | L    | 688.42400      | 344.71564       | 6  |
| 5  | 590.35484      | 295.68106       | V    | 575.33993      | 288.17360       | 5  |
| 6  | 703.43891      | 352.22309       | I    | 476.27151      | 238.63939       | 4  |
| 7  | 790.47094      | 395.73911       | S    | 363.18744      | 182.09736       | 3  |
| 8  | 919.51354      | 460.26041       | E    | 276.15541      | 138.58134       | 2  |
| 9  |                |                 | K    | 147.11281      | 74.06004        | 1  |

>NONHSAT090804+unORF+1+peptide2\_YLYTLVISEKEK

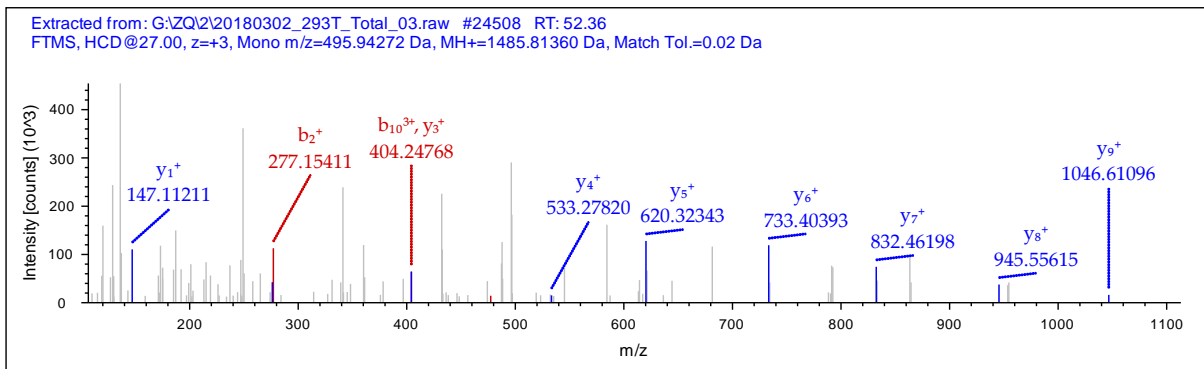

| #1 | b <sup>+</sup> | b <sup>2+</sup> | b <sup>3+</sup> | Seq. | y <sup>+</sup> | y <sup>2+</sup> | y <sup>3+</sup> | #2 |
|----|----------------|-----------------|-----------------|------|----------------|-----------------|-----------------|----|
| 1  | 164.07060      | 82.53894        | 55.36172        | Y    |                |                 |                 | 12 |
| 2  | 277.15467      | 139.08097       | 93.05641        | L    | 1322.75664     | 661.88196       | 441.59040       | 11 |
| 3  | 440.21799      | 220.61263       | 147.41085       | Y    | 1209.67257     | 605.33992       | 403.89571       | 10 |
| 4  | 541.26567      | 271.13647       | 181.09341       | T    | 1046.60925     | 523.80826       | 349.54127       | 9  |
| 5  | 654.34974      | 327.67851       | 218.78810       | L    | 945.56157      | 473.28442       | 315.85871       | 8  |
| 6  | 753.41816      | 377.21272       | 251.81090       | V    | 832.47750      | 416.74239       | 278.16402       | 7  |
| 7  | 866.50223      | 433.75475       | 289.50559       | I    | 733.40908      | 367.20818       | 245.14121       | 6  |
| 8  | 953.53426      | 477.27077       | 318.51627       | S    | 620.32501      | 310.66614       | 207.44652       | 5  |
| 9  | 1082.57686     | 541.79207       | 361.53047       | E    | 533.29298      | 267.15013       | 178.43584       | 4  |
| 10 | 1210.67183     | 605.83955       | 404.22879       | K    | 404.25038      | 202.62883       | 135.42164       | 3  |
| 11 | 1339.71443     | 670.36085       | 447.24299       | E    | 276.15541      | 138.58134       | 92.72332        | 2  |
| 12 |                |                 |                 | K    | 147.11281      | 74.06004        | 49.70912        | 1  |



>NONHSAT090804+unORF+1+peptide2\_YLYTLVISEK

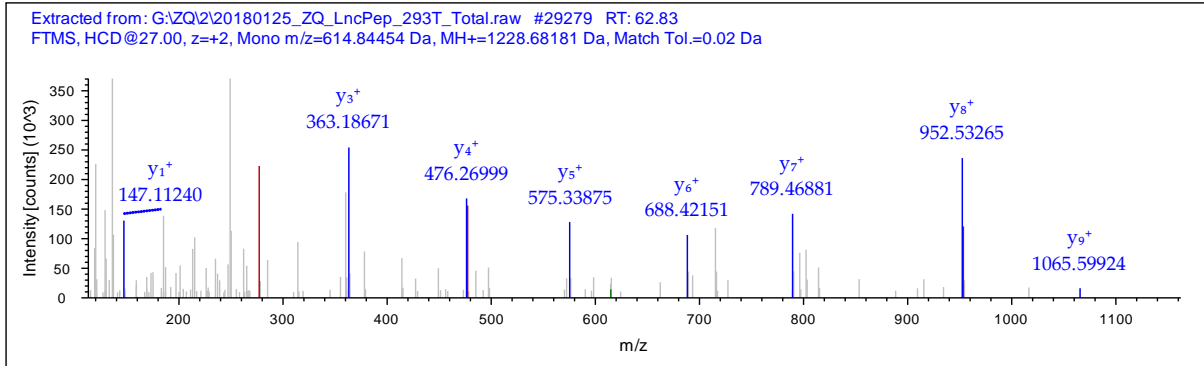

| #1 | b <sup>+</sup> | b <sup>2+</sup> | Seq. | y <sup>+</sup> | y <sup>2+</sup> | #2 |
|----|----------------|-----------------|------|----------------|-----------------|----|
| 1  | 164.07060      | 82.53894        | Y    |                |                 | 10 |
| 2  | 277.15467      | 139.08097       | L    | 1065.61907     | 533.31317       | 9  |
| 3  | 440.21799      | 220.61263       | Y    | 952.53500      | 476.77114       | 8  |
| 4  | 541.26567      | 271.13647       | T    | 789.47168      | 395.23948       | 7  |
| 5  | 654.34974      | 327.67851       | L    | 688.42400      | 344.71564       | 6  |
| 6  | 753.41816      | 377.21272       | V    | 575.33993      | 288.17360       | 5  |
| 7  | 866.50223      | 433.75475       | I    | 476.27151      | 238.63939       | 4  |
| 8  | 953.53426      | 477.27077       | S    | 363.18744      | 182.09736       | 3  |
| 9  | 1082.57686     | 541.79207       | E    | 276.15541      | 138.58134       | 2  |
| 10 |                |                 | K    | 147.11281      | 74.06004        | 1  |

>NONHSAT071306+unORF+1+peptide5\_TDGSQFFICTAK

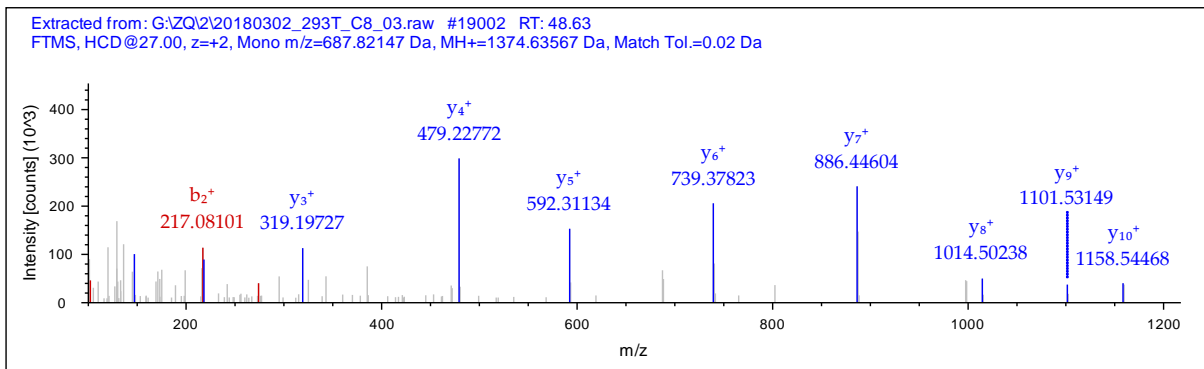

| #1 | b <sup>+</sup> | b <sup>2+</sup> | Seq.            | y <sup>+</sup> | y <sup>2+</sup> | #2 |
|----|----------------|-----------------|-----------------|----------------|-----------------|----|
| 1  | 102.05496      | 51.53112        | T               |                |                 | 12 |
| 2  | 217.08191      | 109.04459       | D               | 1273.58821     | 637.29774       | 11 |
| 3  | 274.10338      | 137.55533       | G               | 1158.56126     | 579.78427       | 10 |
| 4  | 361.13541      | 181.07134       | S               | 1101.53979     | 551.27353       | 9  |
| 5  | 489.19399      | 245.10063       | Q               | 1014.50776     | 507.75752       | 8  |
| 6  | 636.26241      | 318.63484       | F               | 886.44918      | 443.72823       | 7  |
| 7  | 783.33083      | 392.16905       | F               | 739.38076      | 370.19402       | 6  |
| 8  | 896.41490      | 448.71109       | I               | 592.31234      | 296.65981       | 5  |
| 9  | 1056.44555     | 528.72641       | Carbamidomethyl | 479.22827      | 240.11777       | 4  |
| 10 | 1157.49323     | 579.25025       | T               | 319.19761      | 160.10244       | 3  |
| 11 | 1228.53035     | 614.76881       | A               | 218.14993      | 109.57860       | 2  |
| 12 |                |                 | K               | 147.11281      | 74.06004        | 1  |

>NONHSAT071306+unORF+1+peptide5\_AGPNTDGSQFFICTAK

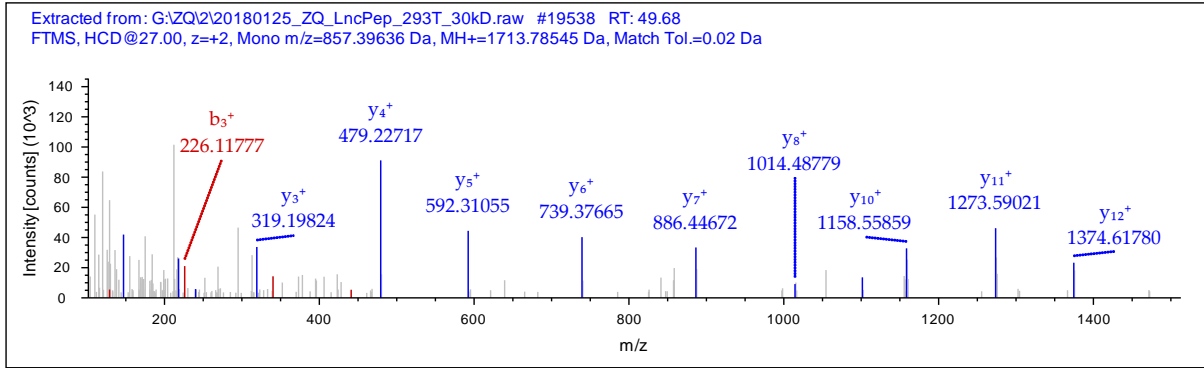

| #1 | b <sup>+</sup> | b <sup>2+</sup> | Seq.            | y <sup>+</sup> | y <sup>2+</sup> | #2 |
|----|----------------|-----------------|-----------------|----------------|-----------------|----|
| 1  | 72.04440       | 36.52584        | A               |                |                 | 16 |
| 2  | 129.06587      | 65.03657        | G               | 1642.75306     | 821.88017       | 15 |
| 3  | 226.11864      | 113.56296       | P               | 1585.73159     | 793.36943       | 14 |
| 4  | 340.16157      | 170.58442       | N               | 1488.67882     | 744.84305       | 13 |
| 5  | 441.20925      | 221.10826       | T               | 1374.63589     | 687.82158       | 12 |
| 6  | 556.23620      | 278.62174       | D               | 1273.58821     | 637.29774       | 11 |
| 7  | 613.25767      | 307.13247       | G               | 1158.56126     | 579.78427       | 10 |
| 8  | 700.28970      | 350.64849       | S               | 1101.53979     | 551.27353       | 9  |
| 9  | 828.34828      | 414.67778       | Q               | 1014.50776     | 507.75752       | 8  |
| 10 | 975.41670      | 488.21199       | F               | 886.44918      | 443.72823       | 7  |
| 11 | 1122.48512     | 561.74620       | F               | 739.38076      | 370.19402       | 6  |
| 12 | 1235.56919     | 618.28823       | I               | 592.31234      | 296.65981       | 5  |
| 13 | 1395.59984     | 698.30356       | Carbamidomethyl | 479.22827      | 240.11777       | 4  |
| 14 | 1496.64752     | 748.82740       | T               | 319.19761      | 160.10244       | 3  |
| 15 | 1567.68464     | 784.34596       | A               | 218.14993      | 109.57860       | 2  |
| 16 |                |                 | K               | 147.11281      | 74.06004        | 1  |

>NONHSAT071306+unORF+1+peptide5\_ANAGPNTDGSQFFICTAK

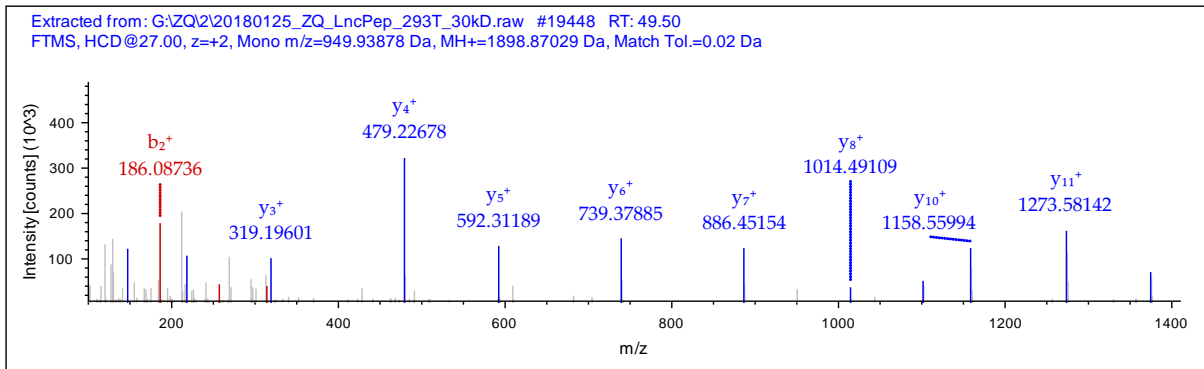

| #1 | b <sup>+</sup> | b <sup>2+</sup> | Seq.            | y <sup>+</sup> | y <sup>2+</sup> | #2 |
|----|----------------|-----------------|-----------------|----------------|-----------------|----|
| 1  | 72.04440       | 36.52584        | A               |                |                 | 18 |
| 2  | 186.08733      | 93.54730        | N               | 1827.83311     | 914.42019       | 17 |
| 3  | 257.12445      | 129.06586       | A               | 1713.79018     | 857.39873       | 16 |
| 4  | 314.14592      | 157.57660       | G               | 1642.75306     | 821.88017       | 15 |
| 5  | 411.19869      | 206.10298       | P               | 1585.73159     | 793.36943       | 14 |
| 6  | 525.24162      | 263.12445       | N               | 1488.67882     | 744.84305       | 13 |
| 7  | 626.28930      | 313.64829       | T               | 1374.63589     | 687.82158       | 12 |
| 8  | 741.31625      | 371.16176       | D               | 1273.58821     | 637.29774       | 11 |
| 9  | 798.33772      | 399.67250       | G               | 1158.56126     | 579.78427       | 10 |
| 10 | 885.36975      | 443.18851       | S               | 1101.53979     | 551.27353       | 9  |
| 11 | 1013.42833     | 507.21780       | Q               | 1014.50776     | 507.75752       | 8  |
| 12 | 1160.49675     | 580.75201       | F               | 886.44918      | 443.72823       | 7  |
| 13 | 1307.56517     | 654.28622       | F               | 739.38076      | 370.19402       | 6  |
| 14 | 1420.64924     | 710.82826       | I               | 592.31234      | 296.65981       | 5  |
| 15 | 1580.67989     | 790.84358       | Carbamidomethyl | 479.22827      | 240.11777       | 4  |
| 16 | 1681.72757     | 841.36742       | T               | 319.19761      | 160.10244       | 3  |
| 17 | 1752.76469     | 876.88598       | A               | 218.14993      | 109.57860       | 2  |
| 18 |                |                 | K               | 147.11281      | 74.06004        | 1  |

>NONHSAT071961+unORF+2+peptide1\_ILEDLPPSSSRPQS

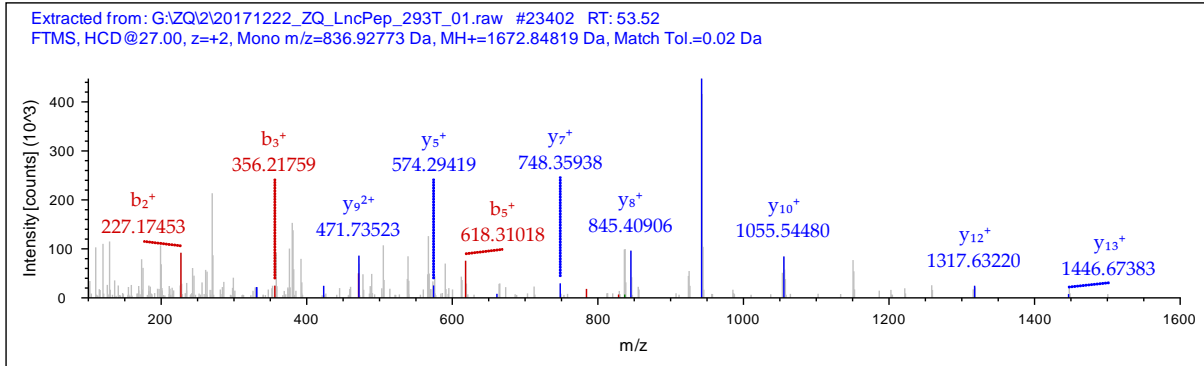

| #1 | b <sup>+</sup> | b <sup>2+</sup> | Seq. | y <sup>+</sup> | y <sup>2+</sup> | #2 |
|----|----------------|-----------------|------|----------------|-----------------|----|
| 1  | 114.09135      | 57.54931        | I    |                |                 | 15 |
| 2  | 227.17542      | 114.09135       | L    | 1559.77008     | 780.38868       | 14 |
| 3  | 356.21802      | 178.61265       | E    | 1446.68601     | 723.84664       | 13 |
| 4  | 471.24497      | 236.12612       | D    | 1317.64341     | 659.32534       | 12 |
| 5  | 618.31339      | 309.66033       | F    | 1202.61646     | 601.81187       | 11 |
| 6  | 731.39746      | 366.20237       | L    | 1055.54804     | 528.27766       | 10 |
| 7  | 828.45023      | 414.72875       | P    | 942.46397      | 471.73562       | 9  |
| 8  | 925.50300      | 463.25514       | P    | 845.41120      | 423.20924       | 8  |
| 9  | 1012.53503     | 506.77115       | S    | 748.35843      | 374.68285       | 7  |
| 10 | 1099.56706     | 550.28717       | S    | 661.32640      | 331.16684       | 6  |
| 11 | 1186.59909     | 593.80318       | S    | 574.29437      | 287.65082       | 5  |
| 12 | 1342.70021     | 671.85374       | R    | 487.26234      | 244.13481       | 4  |
| 13 | 1439.75298     | 720.38013       | P    | 331.16122      | 166.08425       | 3  |
| 14 | 1567.81156     | 784.40942       | Q    | 234.10845      | 117.55786       | 2  |
| 15 |                |                 | S    | 106.04987      | 53.52857        | 1  |

>NONHSAT126926+unORF+2+peptide1\_TAAAAAAGTITRPR

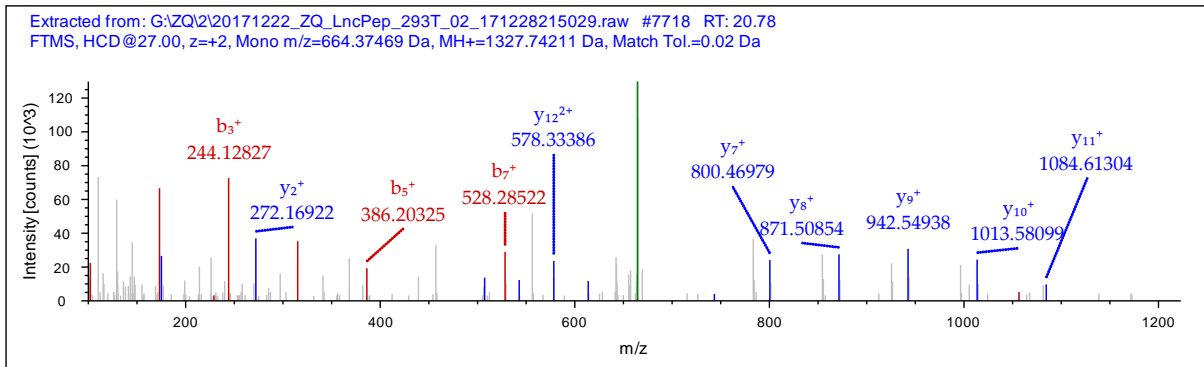

| #1 | b <sup>+</sup> | b <sup>2+</sup> | Seq. | y <sup>+</sup> | y <sup>2+</sup> | #2 |
|----|----------------|-----------------|------|----------------|-----------------|----|
| 1  | 102.05496      | 51.53112        | T    |                |                 | 14 |
| 2  | 173.09208      | 87.04968        | A    | 1226.69647     | 613.85187       | 13 |
| 3  | 244.12920      | 122.56824       | A    | 1155.65935     | 578.33331       | 12 |
| 4  | 315.16632      | 158.08680       | A    | 1084.62223     | 542.81475       | 11 |
| 5  | 386.20344      | 193.60536       | A    | 1013.58511     | 507.29619       | 10 |
| 6  | 457.24056      | 229.12392       | A    | 942.54799      | 471.77763       | 9  |
| 7  | 528.27768      | 264.64248       | A    | 871.51087      | 436.25907       | 8  |
| 8  | 585.29915      | 293.15321       | G    | 800.47375      | 400.74051       | 7  |
| 9  | 686.34683      | 343.67705       | T    | 743.45228      | 372.22978       | 6  |
| 10 | 799.43090      | 400.21909       | I    | 642.40460      | 321.70594       | 5  |
| 11 | 900.47858      | 450.74293       | T    | 529.32053      | 265.16390       | 4  |
| 12 | 1056.57970     | 528.79349       | R    | 428.27285      | 214.64006       | 3  |
| 13 | 1153.63247     | 577.31987       | P    | 272.17173      | 136.58950       | 2  |
| 14 |                |                 | R    | 175.11896      | 88.06312        | 1  |

>NONHSAT009961+2+orf1\_QTGAVCVHASPR

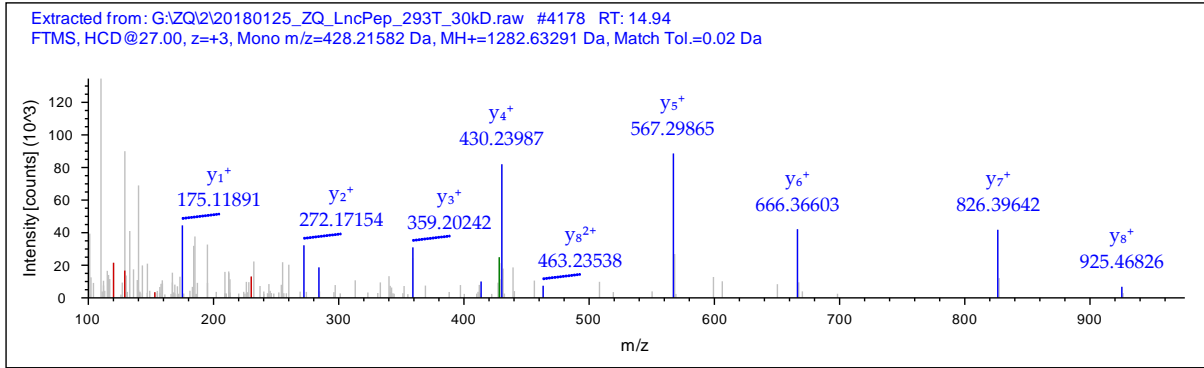

| #1 | b <sup>+</sup> | b <sup>2+</sup> | b <sup>3+</sup> | Seq.            | y <sup>+</sup> | y <sup>2+</sup> | y <sup>3+</sup> | #2 |
|----|----------------|-----------------|-----------------|-----------------|----------------|-----------------|-----------------|----|
| 1  | 129.06586      | 65.03657        | 43.69347        | Q               |                |                 |                 | 12 |
| 2  | 230.11354      | 115.56041       | 77.37603        | T               | 1154.57356     | 577.79042       | 385.52937       | 11 |
| 3  | 287.13501      | 144.07114       | 96.38319        | G               | 1053.52588     | 527.26588       | 351.84681       | 10 |
| 4  | 358.17213      | 179.58970       | 120.06223       | A               | 996.50441      | 498.75584       | 332.83965       | 9  |
| 5  | 457.24055      | 229.12391       | 153.08503       | V               | 925.46729      | 463.23728       | 309.16061       | 8  |
| 6  | 617.27120      | 309.13924       | 206.42858       | Carbamidomethyl | 826.39887      | 413.70307       | 276.13781       | 7  |
| 7  | 716.33962      | 358.67345       | 239.45139       | V               | 666.36821      | 333.68774       | 222.79425       | 6  |
| 8  | 853.39853      | 427.20290       | 285.13769       | H               | 567.29979      | 284.15353       | 189.77145       | 5  |
| 9  | 924.43665      | 462.72146       | 308.81673       | A               | 430.24088      | 215.62408       | 144.08514       | 4  |
| 10 | 1011.46768     | 506.23748       | 337.82741       | S               | 359.20376      | 180.10552       | 120.40610       | 3  |
| 11 | 1108.52045     | 554.76386       | 370.17833       | P               | 272.17173      | 136.58950       | 91.39543        | 2  |
| 12 |                |                 |                 | R               | 175.11896      | 88.06312        | 59.04450        | 1  |

>NONHSAT009961+2+orf1\_DLGLSLGQEEAAGGGSDGK

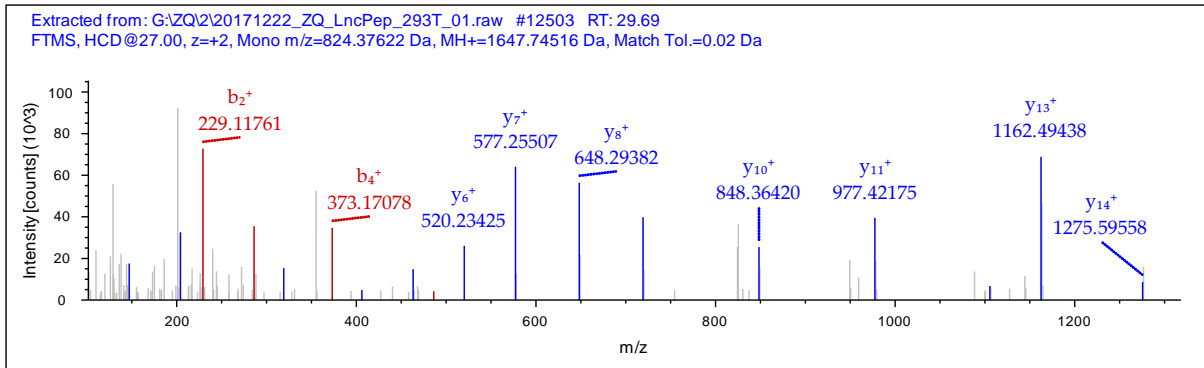

| #1 | b <sup>+</sup> | b <sup>2+</sup> | Seq. | y <sup>+</sup> | y <sup>2+</sup> | #2 |
|----|----------------|-----------------|------|----------------|-----------------|----|
| 1  | 116.03423      | 58.52075        | D    |                |                 | 18 |
| 2  | 229.11830      | 115.06279       | L    | 1532.71880     | 766.86304       | 17 |
| 3  | 286.13977      | 143.57352       | G    | 1419.63473     | 710.32100       | 16 |
| 4  | 373.17180      | 187.08954       | S    | 1362.61326     | 681.81027       | 15 |
| 5  | 486.25587      | 243.63157       | L    | 1275.58123     | 638.29425       | 14 |
| 6  | 543.27734      | 272.14231       | G    | 1162.49716     | 581.75222       | 13 |
| 7  | 671.33592      | 336.17160       | Q    | 1105.47569     | 553.24148       | 12 |
| 8  | 800.37852      | 400.69290       | E    | 977.41711      | 489.21219       | 11 |
| 9  | 929.42112      | 465.21420       | E    | 848.37451      | 424.69089       | 10 |
| 10 | 1000.45824     | 500.73276       | A    | 719.33191      | 360.16959       | 9  |
| 11 | 1071.49536     | 536.25132       | A    | 648.29479      | 324.65103       | 8  |
| 12 | 1128.51683     | 564.76205       | G    | 577.25767      | 289.13247       | 7  |
| 13 | 1185.53830     | 593.27279       | G    | 520.23620      | 260.62174       | 6  |
| 14 | 1242.55977     | 621.78352       | G    | 463.21473      | 232.11100       | 5  |
| 15 | 1329.59180     | 665.29954       | S    | 406.19326      | 203.60027       | 4  |
| 16 | 1444.61875     | 722.81301       | D    | 319.16123      | 160.08425       | 3  |
| 17 | 1501.64022     | 751.32375       | G    | 204.13428      | 102.57078       | 2  |
| 18 |                |                 | K    | 147.11281      | 74.06004        | 1  |

>NONHSAT122600+1+orf1\_AAAAAAAAAAAAAASAR

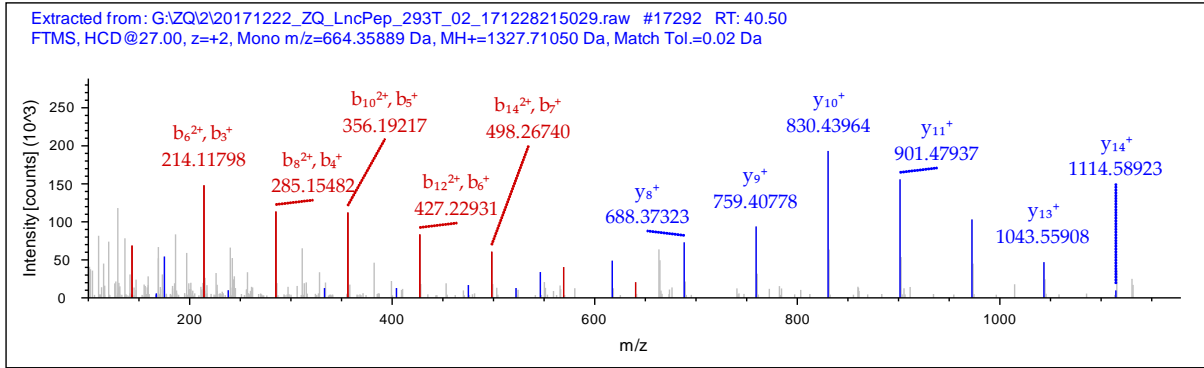

| #1 | b <sup>+</sup> | b <sup>2+</sup> | Seq. | y <sup>+</sup> | y <sup>2+</sup> | #2 |
|----|----------------|-----------------|------|----------------|-----------------|----|
| 1  | 72.04440       | 36.52584        | A    |                |                 | 17 |
| 2  | 143.08152      | 72.04440        | A    | 1256.67067     | 628.83897       | 16 |
| 3  | 214.11864      | 107.56296       | A    | 1185.63355     | 593.32041       | 15 |
| 4  | 285.15576      | 143.08152       | A    | 1114.59643     | 557.80185       | 14 |
| 5  | 356.19288      | 178.60008       | A    | 1043.55931     | 522.28329       | 13 |
| 6  | 427.23000      | 214.11864       | A    | 972.52219      | 486.76473       | 12 |
| 7  | 498.26712      | 249.63720       | A    | 901.48507      | 451.24617       | 11 |
| 8  | 569.30424      | 285.15576       | A    | 830.44795      | 415.72761       | 10 |
| 9  | 640.34136      | 320.67432       | A    | 759.41083      | 380.20905       | 9  |
| 10 | 711.37848      | 356.19288       | A    | 688.37371      | 344.69049       | 8  |
| 11 | 782.41560      | 391.71144       | A    | 617.33659      | 309.17193       | 7  |
| 12 | 853.45272      | 427.23000       | A    | 546.29947      | 273.65337       | 6  |
| 13 | 924.48984      | 462.74856       | A    | 475.26235      | 238.13481       | 5  |
| 14 | 995.52696      | 498.26712       | A    | 404.22523      | 202.61625       | 4  |
| 15 | 1082.55899     | 541.78313       | S    | 333.18811      | 167.09769       | 3  |
| 16 | 1153.59611     | 577.30169       | A    | 246.15608      | 123.58168       | 2  |
| 17 |                |                 | R    | 175.11896      | 88.06312        | 1  |

>NONHSAT087209+1+orf1\_NQDPASAAAAEEVR

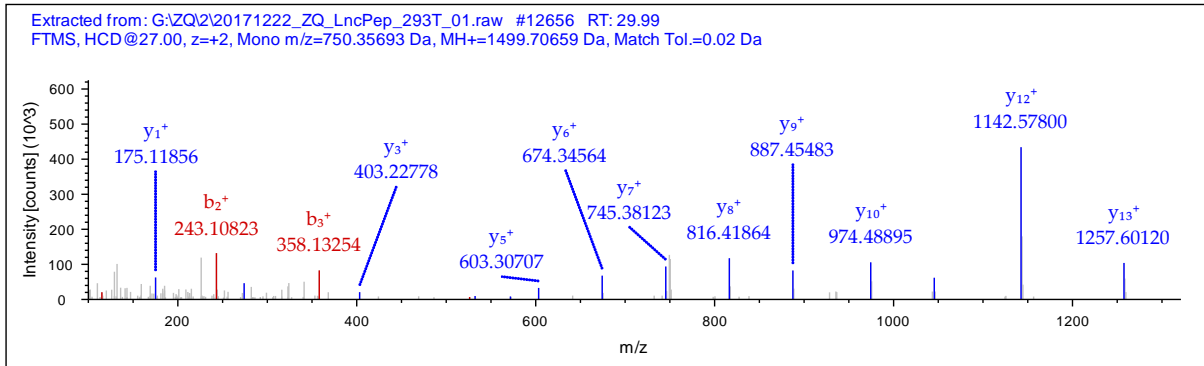

| #1 | b <sup>+</sup> | b <sup>2+</sup> | Seq. | y <sup>+</sup> | y <sup>2+</sup> | #2 |
|----|----------------|-----------------|------|----------------|-----------------|----|
| 1  | 115.05021      | 58.02874        | N    |                |                 | 15 |
| 2  | 243.10879      | 122.05803       | Q    | 1385.66563     | 693.33645       | 14 |
| 3  | 358.13574      | 179.57151       | D    | 1257.60705     | 629.30716       | 13 |
| 4  | 455.18851      | 228.09789       | P    | 1142.58010     | 571.79369       | 12 |
| 5  | 526.22563      | 263.61645       | A    | 1045.52733     | 523.26730       | 11 |
| 6  | 613.25766      | 307.13247       | S    | 974.49021      | 487.74874       | 10 |
| 7  | 684.29478      | 342.65103       | A    | 887.45818      | 444.23273       | 9  |
| 8  | 755.33190      | 378.16959       | A    | 816.42106      | 408.71417       | 8  |
| 9  | 826.36902      | 413.68815       | A    | 745.38394      | 373.19561       | 7  |
| 10 | 897.40614      | 449.20671       | A    | 674.34682      | 337.67705       | 6  |
| 11 | 968.44326      | 484.72527       | A    | 603.30970      | 302.15849       | 5  |
| 12 | 1097.48586     | 549.24657       | E    | 532.27258      | 266.63993       | 4  |
| 13 | 1226.52846     | 613.76787       | E    | 403.22998      | 202.11863       | 3  |
| 14 | 1325.59688     | 663.30208       | V    | 274.18738      | 137.59733       | 2  |
| 15 |                |                 | R    | 175.11896      | 88.06312        | 1  |
